# Supplementary material for: Mosaic RBD nanoparticles protect against challenge by diverse sarbecoviruses in animal models
Source: PubMed Central journal article supplement (PMC9273039; doi:10.1126/science.abq0839), 2022-07-05
Supplement: science.abq0839_sm.pdf [file science.abq0839_sm.pdf]

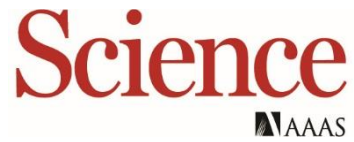

## Supplementary Materials for

### **Mosaic RBD nanoparticles protect against challenge by diverse sarbecoviruses in animal models**

Alexander A. Cohen *et al.*

Corresponding author: Pamela J. Bjorkman, [bjorkman@caltech.edu](mailto:bjorkman@caltech.edu)

DOI: [10.1126/science.abq0839](https://doi.org/10.1126/science.abq0839)

#### **The PDF file includes:**

Figs. S1 to S10

#### **Other Supplementary Material for this manuscript includes the following:**

MDAR Reproducibility Checklist  
Data S1 to S3

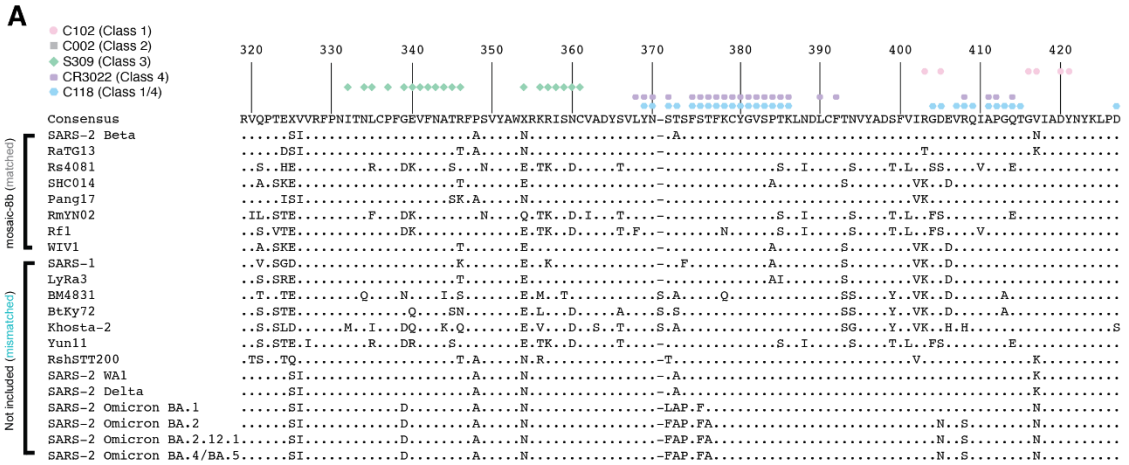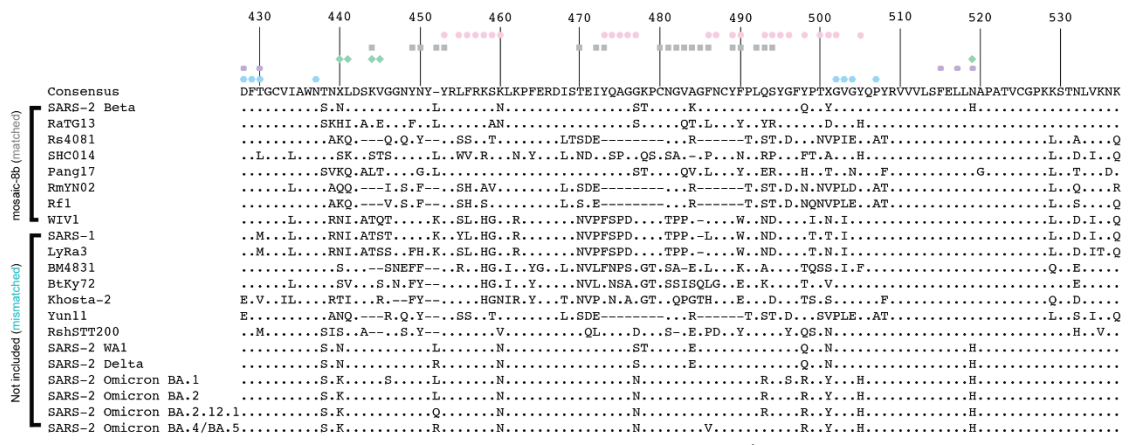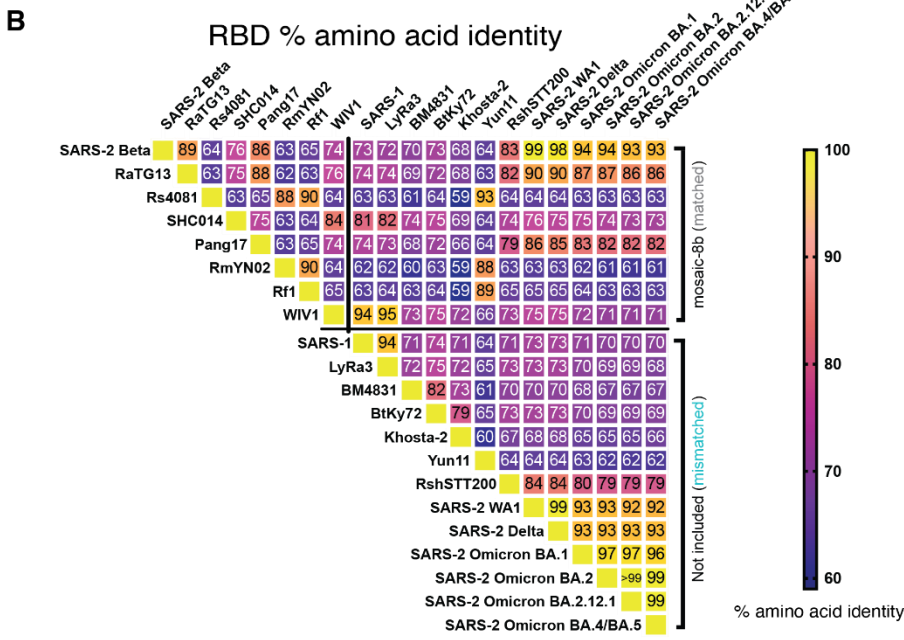

Figure S1. Sequence alignment and identity table for RBDs from sarbecoviruses. RBDs that are present on mosaic-8b RBD-mi3 are labeled as matched, while RBDs that are not present are labeled as mismatched. **(A)** Sequence alignment of RBDs from sarbecovirus strains and SARS-2 VOCs aligned using Clustal Omega 1.2.3. RBD residues that interact with the indicated representative class 1, 2, 3, 4, and 1/4 anti-RBD antibodies (defined as a residue including one or more atoms within 4 Å of the V<sub>H</sub>-V<sub>L</sub> region of the bound antibody) are denoted with different colored symbols. Structures used for these assignments: C102: PDB 7K8M; C002: PDB 7K8T, S309: PDB 7JX3; CR3022: PDB 7LOP; C118: PDB 7RKV. Identification of RBD residues within particular epitopes is approximate only, since assignments will vary depending upon which antibody is used for the representative member of each anti-RBD antibody class. **(B)** RBD amino acid sequence-based identity matrix based on the alignment in (A) for different sarbecovirus strains and SARS-2 VOCs.

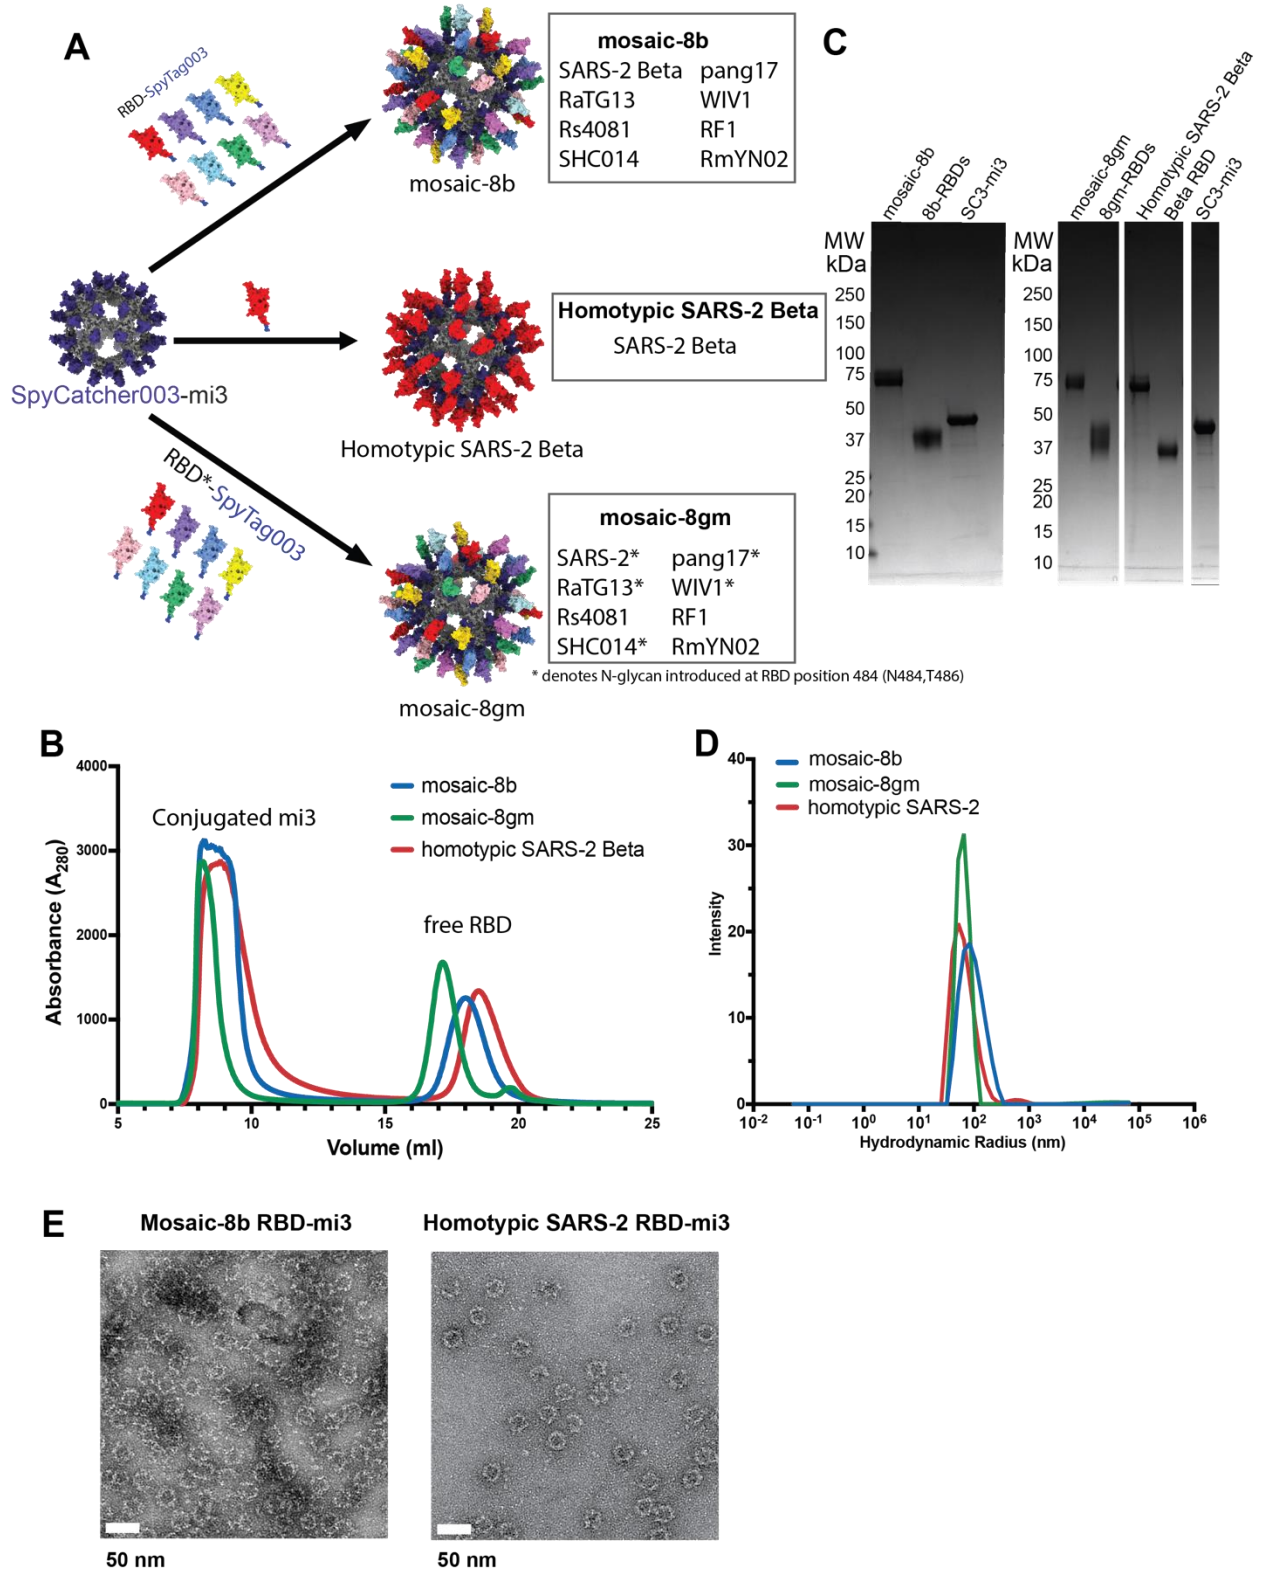

Figure S2. Preparation of RBD-mi3 nanoparticles. **(A)** Schematic for construction of mosaic-8b, mosaic-8gm, and homotypic SARS-2 Beta RBD-mi3 nanoparticles. **(B)** Superose 6 10/300 SEC profile after RBD conjugations to mi3 (2-fold molar excess of RBD to mi3 subunit) showing peaks for RBD-mi3 nanoparticles and free RBD(s). **(C)** SDS-PAGE (Coomassie staining) of RBD-coupled nanoparticles, free RBDs, and free SpyCatcher003-mi3 particles (SC3-mi3). **(D)** Dynamic light scattering (DLS) measurements for RBD-coupled nanoparticles. Hydrodynamic radii were measured as 42 +/- 0.6 nm (n=10) (mosaic-8b), 33 +/- 0.9 nm (n=10) (mosaic-8gm), and 48 +/- 0.7 nm (n=10) (homotypic SARS-2). **(E)** Negative-stain EM images of RBD-coupled mi3 nanoparticles.

**A**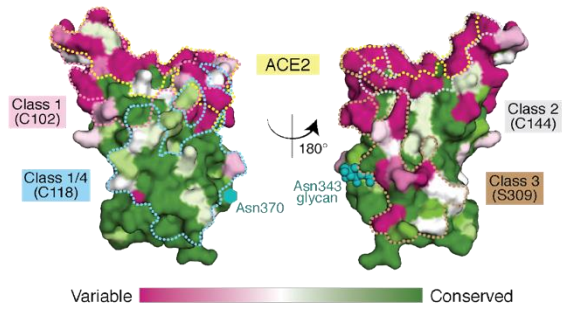**B**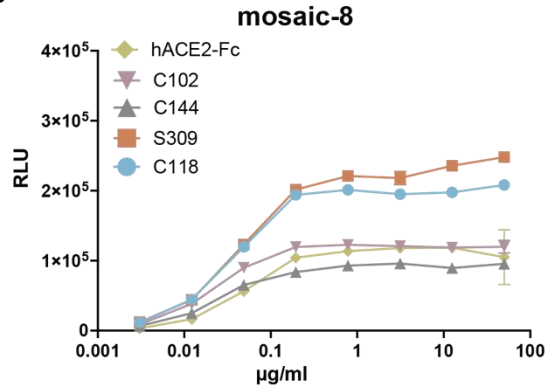**C**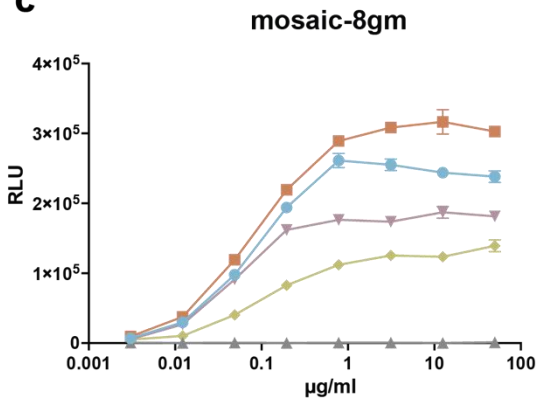**D**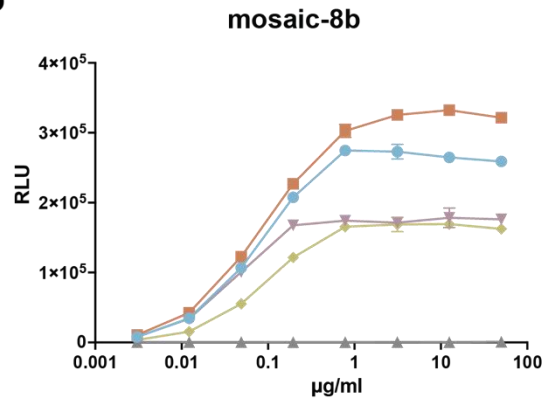**E**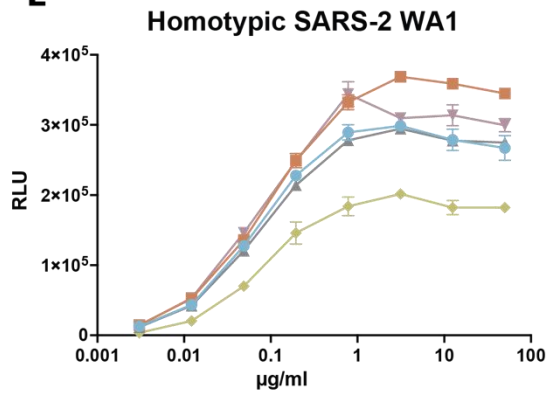**F**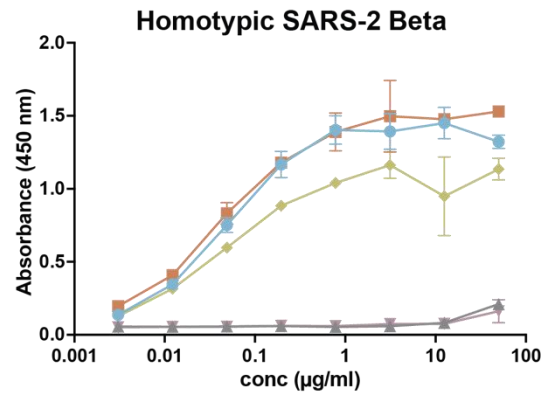

Figure S3. Binding characteristics of mosaic and homotypic RBD-mi3 nanoparticles. **(A)** Sequence conservation of the 16 sarbecovirus RBDs in Fig. 1D calculated by the ConSurf Database (81) shown on two views of an RBD surface (PDB 7BZ5). The ACE2 binding footprint (PDB 6M0J) is outlined by yellow dots. Epitopes of representative monoclonal antibodies used in binding experiments are outlined in dots of the indicated colors using information from structures of Fabs bound to RBD or S trimer (C118: PDB 7RKS, S309: PDB 7JX3; C144: PDB 7K90, C102: PDB 7K8M). The N-linked glycan attached to RBD residue 343 is indicated by teal spheres, and the potential N-linked glycosylation site at position 370 in RBDs derived from sarbecoviruses other than SARS-2 is indicated by a teal circle. **(B-F)** ELISAs to assess binding of the hACE2-Fc and the indicated monoclonal antibodies to RBD-mi3 nanoparticles. Nanoparticles were immobilized on an ELISA plate, incubated with the indicated monoclonal antibody or hACE2-Fc, and binding was detected using a labeled anti-human IgG secondary antibody. Data points are presented as the mean and standard deviation of duplicate measurements. Some error bars are too small to be distinguished from data points. RLU = relative luminescence units. **(B)** Binding to mosaic-8 RBD-mi3 (WA1 SARS-2 RBD plus seven animal sarbecovirus RBDs as previously described (34) and in fig. S2A). **(C)** Binding to mosaic-8gm RBD-mi3 (mosaic-8 with a WA1 SARS-2 RBD plus the seven animal sarbecovirus RBDs in which N-linked glycosylation site sequons at RBD position 484 were introduced in the clade 1a and 1b RBDs to occlude class 1 and 2 RBD epitopes). **(D)** Binding to mosaic-8b RBD-mi3 (SARS-2 Beta RBD plus the seven animal sarbecovirus RBDs in fig. S2A). **(E)** Binding to homotypic SARS-2 WA1 RBD-mi3 (as previously described (34)). **(F)** Binding to homotypic SARS-2 Beta RBD-mi3.

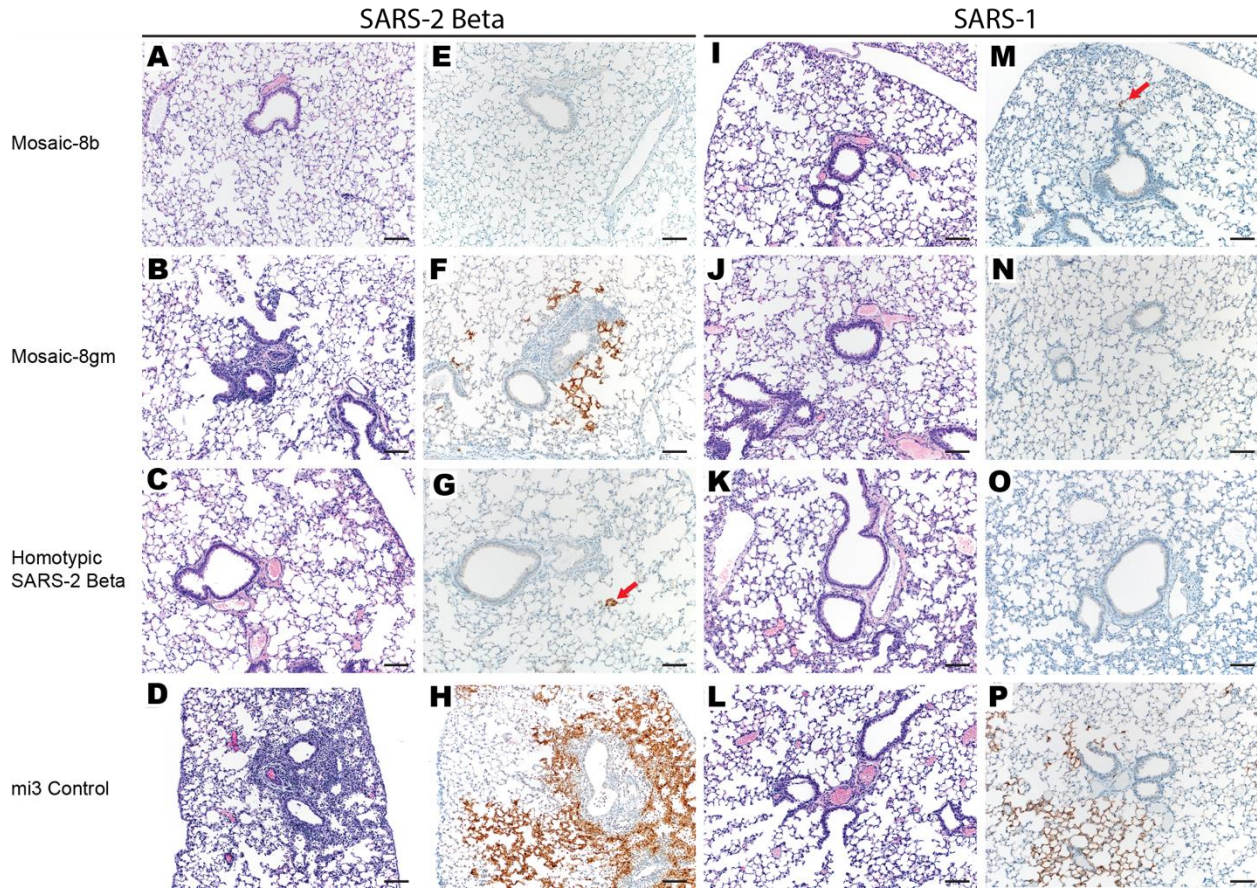

Q

|                |                                | SARS-2 Beta |   |   |    |            |    |    |    |                       |    |    |   |             |    |    |   |
|----------------|--------------------------------|-------------|---|---|----|------------|----|----|----|-----------------------|----|----|---|-------------|----|----|---|
|                |                                | Mosaic-8b   |   |   |    | Mosaic-8gm |    |    |    | Homotypic SARS-2 Beta |    |    |   | mi3 control |    |    |   |
| H & E Staining | Lung Lesions %                 | 0           | 1 | 0 | 0  | 0          | 0  | 5  | 20 | 0                     | 0  | 0  | 0 | <1          | 30 | 5  | 0 |
|                | Interstitial pneumonia         | 0           | 0 | 0 | 0  | 0          | 0  | 1  | 2  | 0                     | 0  | 0  | 0 | 0           | 1  | 1  | 0 |
|                | Bronchiolitis                  | 0           | 1 | 0 | 0  | 0          | 0  | 1  | 2  | 0                     | 0  | 0  | 0 | 0           | 1  | 1  | 0 |
|                | perivascular leukocyte cuffing | 0           | 0 | 0 | 0  | 0          | 0  | 1  | 2  | 0                     | 0  | 0  | 1 | 1           | 3  | 1  | 0 |
| IHC            | Staining %                     | 0           | 5 | 0 | <1 | 0          | <1 | 10 | 40 | 0                     | <1 | <1 | 0 | <1          | 90 | 20 | 0 |
|                | Type I and II pneumocytes      | 0           | 2 | 0 | 2  | 0          | 1  | 3  | 4  | 0                     | 1  | 1  | 0 | 1           | 5  | 2  | 0 |

|                |                                | SARS-1    |    |   |   |            |    |    |   |                       |   |    |   |             |    |    |    |
|----------------|--------------------------------|-----------|----|---|---|------------|----|----|---|-----------------------|---|----|---|-------------|----|----|----|
|                |                                | Mosaic-8b |    |   |   | Mosaic-8gm |    |    |   | Homotypic SARS-2 Beta |   |    |   | mi3 control |    |    |    |
| H & E Staining | Lung Lesions %                 | 0         | 0  | 0 | 0 | 0          | 0  | <1 | 0 | 0                     | 0 | 0  | 0 | 0           | 5  | 0  | 0  |
|                | Interstitial pneumonia         | 0         | 0  | 0 | 0 | 0          | 0  | 1  | 0 | 0                     | 0 | 0  | 0 | 0           | 1  | 0  | 0  |
|                | Bronchiolitis                  | 0         | 0  | 0 | 0 | 0          | 0  | 1  | 0 | 0                     | 0 | 0  | 0 | 0           | 1  | 0  | 0  |
|                | perivascular leukocyte cuffing | 0         | 0  | 0 | 0 | 0          | 0  | 0  | 1 | 0                     | 0 | 1  | 0 | 0           | 0  | 1  | 0  |
| IHC            | Staining %                     | <1        | <1 | 0 | 0 | 0          | <1 | 0  | 0 | 0                     | 0 | <1 | 0 | 10          | 90 | 60 | 50 |
|                | Type I and II pneumocytes      | 2         | 1  | 0 | 0 | 0          | 2  | 0  | 0 | 0                     | 0 | 2  | 0 | 2           | 5  | 4  | 4  |



Figure S4. Lung pathology is reduced in mosaic-8b immunized mice challenged with either SARS-2 or SARS-1. Images taken at 100x magnification. Scale bar = 100µm. Red arrows = immunoreactivity in panels G and M. **(A-D)** Hematoxylin and eosin (H&E) stained lung tissue sections from animals vaccinated with either mosaic-8b, mosaic-8gm, homotypic SARS-2 Beta, or unconjugated mi3 and challenged with SARS-2 Beta (minimal-mild peribronchial inflammation in panels B and D). **(E-H)** Immunohistochemistry (IHC) staining for SARS-CoV-2 N protein antigen from animals vaccinated with either mosaic-8b, mosaic-8gm, homotypic SARS-2 Beta, or mi3 and challenged with SARS-2 Beta. **(I-L)** H&E stained lung tissue sections from animals vaccinated with either mosaic-8b, mosaic-8gm, homotypic SARS-2 Beta, or mi3 and challenged with SARS-1. **(M-P)** IHC staining for SARS-CoV-2 N protein antigen from animals vaccinated with either mosaic-8b, mosaic-8gm, homotypic SARS-2 Beta, or mi3 and challenged with SARS-1. **(Q)** Pathology and IHC for lung tissue isolated from vaccinated K18-hACE2 mice challenged with either SARS-2 Beta or SARS-1. Scoring for hematoxylin and eosin (H&E) is as follows: 0 = not present; 1 = minimal, 1-10%; 2 = mild, 11-25%; 3 = moderate, 26-50%; 4 = marked, 51-75%; 5 = severe, 76-100%. Scoring for IHC is as follows: 0 = not present; 1 = rare/few; 2 = scattered; 3 = moderate; 4 = numerous; 5 = diffuse. Each column represents a single animal.

Analysis: Upon challenge with SARS-2 Beta, two of four mi3 control animals exhibited lesions characterized by minimal interstitial pneumonia centered on terminal bronchioles and extending into the adjacent alveoli with minimal to moderate perivascular leucocyte cuffing and alveolar exudate (panels B,D,Q (top)). IHC for SARS-2 N protein showed staining in cells from three of four animals (<1-90% of type I and II cells) (panels D,H,Q (top)). In contrast, minimal to no lesions were observed in mosaic-8b and homotypic SARS-2 Beta immunized animals (panels A,C,Q (top)). Two of four animals immunized with mosaic-8gm exhibited lesions characterized by mild interstitial pneumonia. IHC staining for SARS-2 N protein showed minimal viral antigen present in mosaic-8b (1-5% of cells) and homotypic SARS-2 Beta immunized animals (two of four with <1% of stained cells) (panels E,G,Q (top)), whereas some staining was found in animals in the mosaic-8gm (three of four had <1-40% of stained type I and II pneumocytes). For the SARS-1 challenge, one animal in the control group exhibited lesions affecting 5% of the lung characterized by a minimal interstitial pneumonia centered on terminal bronchioles with minimal alveolar exudate (panels L,Q, (bottom)), whereas all four animals exhibited antigen staining (10-90% staining of type I and II cells) (panel P,Q (bottom)). In contrast, animals immunized with mosaic-8b did not have any observable pulmonary pathology (panel I,Q (bottom)). One animal vaccinated with mosaic-8gm had minimal interstitial pneumonia with peribronchial inflammation affecting less than 1% of the lung (panel J,Q (bottom)). Animals vaccinated with homotypic SARS-2 Beta did not have pulmonary lesions, except for one animal with minimal perivascular cuffing (panel K, Q (bottom)). In addition, animals vaccinated with mosaic-8b, mosaic-8gm, and homotypic SARS-2 Beta showed minimal to no antigen staining (all <1% in type I and II pneumocytes) (panel M-O,Q (bottom)). Overall, mosaic-8b immunization was efficacious against both SARS-1 and SARS-2 challenge. Mosaic-8gm immunized animals showed low levels of viral antigen staining in lung tissue obtained from SARS-1 challenged animals, but not SARS-2 challenged animals, whereas homotypic SARS-2 Beta immunized animals showed control of SARS-2 Beta and SARS-1 in the lungs matching the suppression of viral load in lung tissue (Fig. 3C,D). Of note, viral control in lung tissue did not match severity of disease for vaccinated animals (Fig 3A,B), most likely due to the neurological basis of disease severity in this animal model (50).

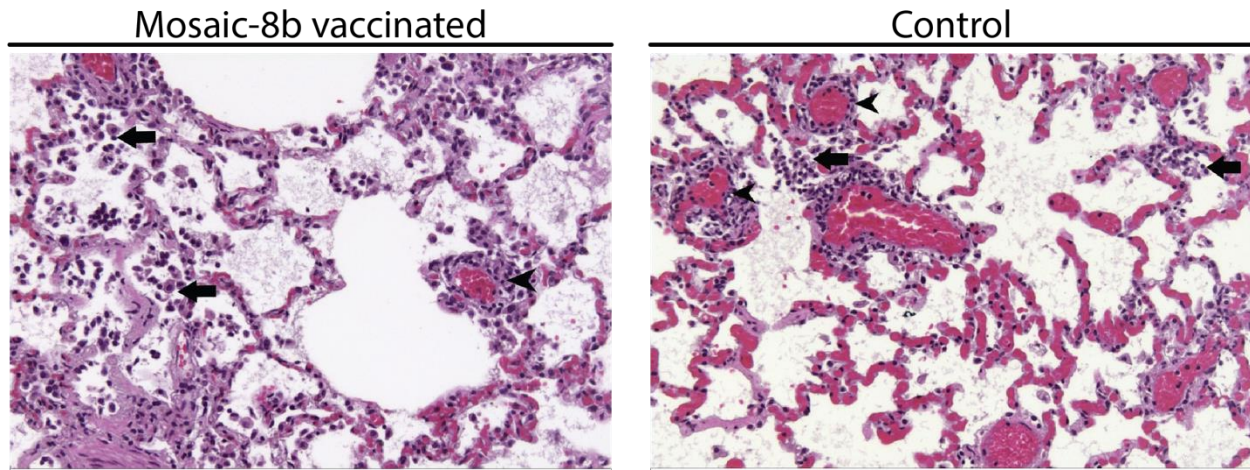

|                                                                                   |         | Males     |         | Females   |         |
|-----------------------------------------------------------------------------------|---------|-----------|---------|-----------|---------|
| Groups                                                                            |         | Mosaic-8b | control | Mosaic-8b | control |
| Animals/group                                                                     |         | 2         | 2       | 2         | 2       |
| <b>LUNG</b>                                                                       |         |           |         |           |         |
| Inflammation, mixed or mononuclear, alveolar, bronchoalveolar and/or perivascular |         | 2         | 2       | 1         | 1       |
|                                                                                   | minimal | 1         | 2       | 1         | 1       |
|                                                                                   | mild    | 1         | -       | -         | -       |
| Alveolar macrophages, increased                                                   |         | 2         | 1       | 2         | 0       |
|                                                                                   | minimal | 2         | 1       | 2         | -       |

Figure S5. Top: Lung pathology analyses in mosaic-8b and control immunized NHPs after SARS-2 Delta challenge revealed no detectable differences. Images were taken at 20x magnification. Left: representative image of lung tissue 4 days post challenge from mosaic-8b immunized animals. Right: representative image of lung tissue 4 days post challenge from control (adjuvant only) animals. Mononuclear cell inflammation was observed in alveolar spaces (arrows) and perivascularly (arrowheads). Bottom: Pathology for lung tissue isolated from vaccinated NHPs challenged with SARS-2 Delta. Histological score with % tissue involvement is as follows: 1 = minimal <10%, 2 = mild, 10-25%, 3 = moderate, 25-40%, 4 = marked, 50-95%, 5 = severe, >95%.

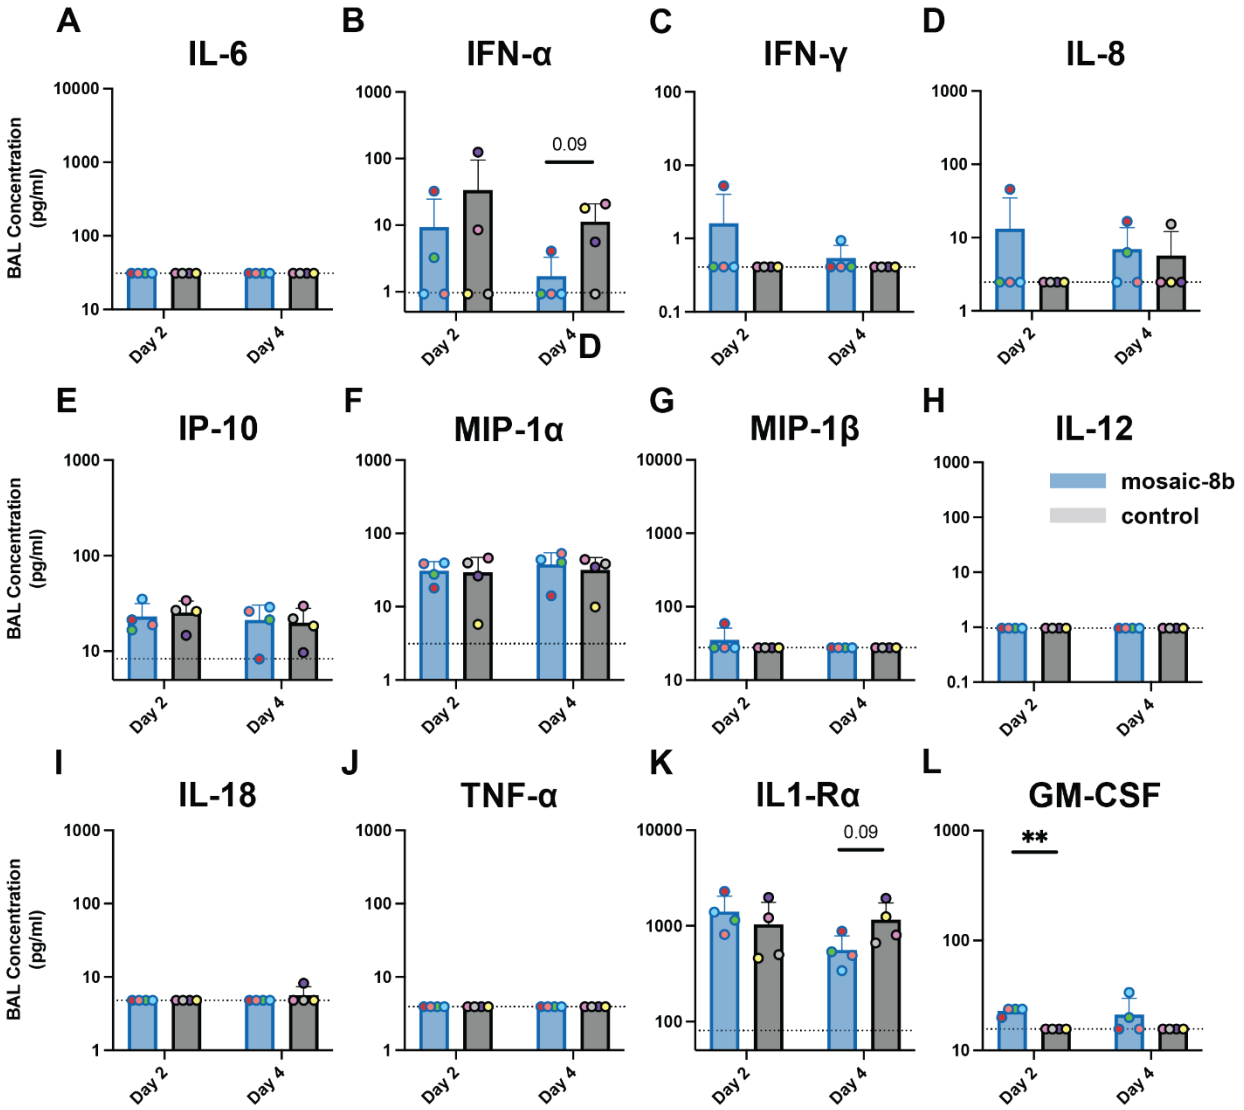

Figure S6. Cytokines and chemokines induced by SARS-2 Delta challenge in bronchial alveolar lavage (BAL) samples. Multiple cytokines and chemokines in Day 2 and Day 4 post challenge BAL samples were analyzed simultaneously using Luminex technology. Levels were measured for (A) IL-6, (B) IFN- $\alpha$ , (C) IFN- $\gamma$ , (D) IL-8, (E) IP-10, (F) MIP-1 $\alpha$ , (G) MIP-1 $\beta$ , (H) IL-12, (I) IL-18, (J) TNF- $\alpha$ , and (K) IL-1-R $\alpha$ , (L) GM-CSF. Dashed horizontal lines correspond to background values representing the limit of detection. Significant differences between cohorts linked by horizontal lines are indicated by asterisks: p<0.05 = \*, p<0.01 = \*\*, p<0.001 = \*\*\*, p<0.0001 = \*\*\*\*

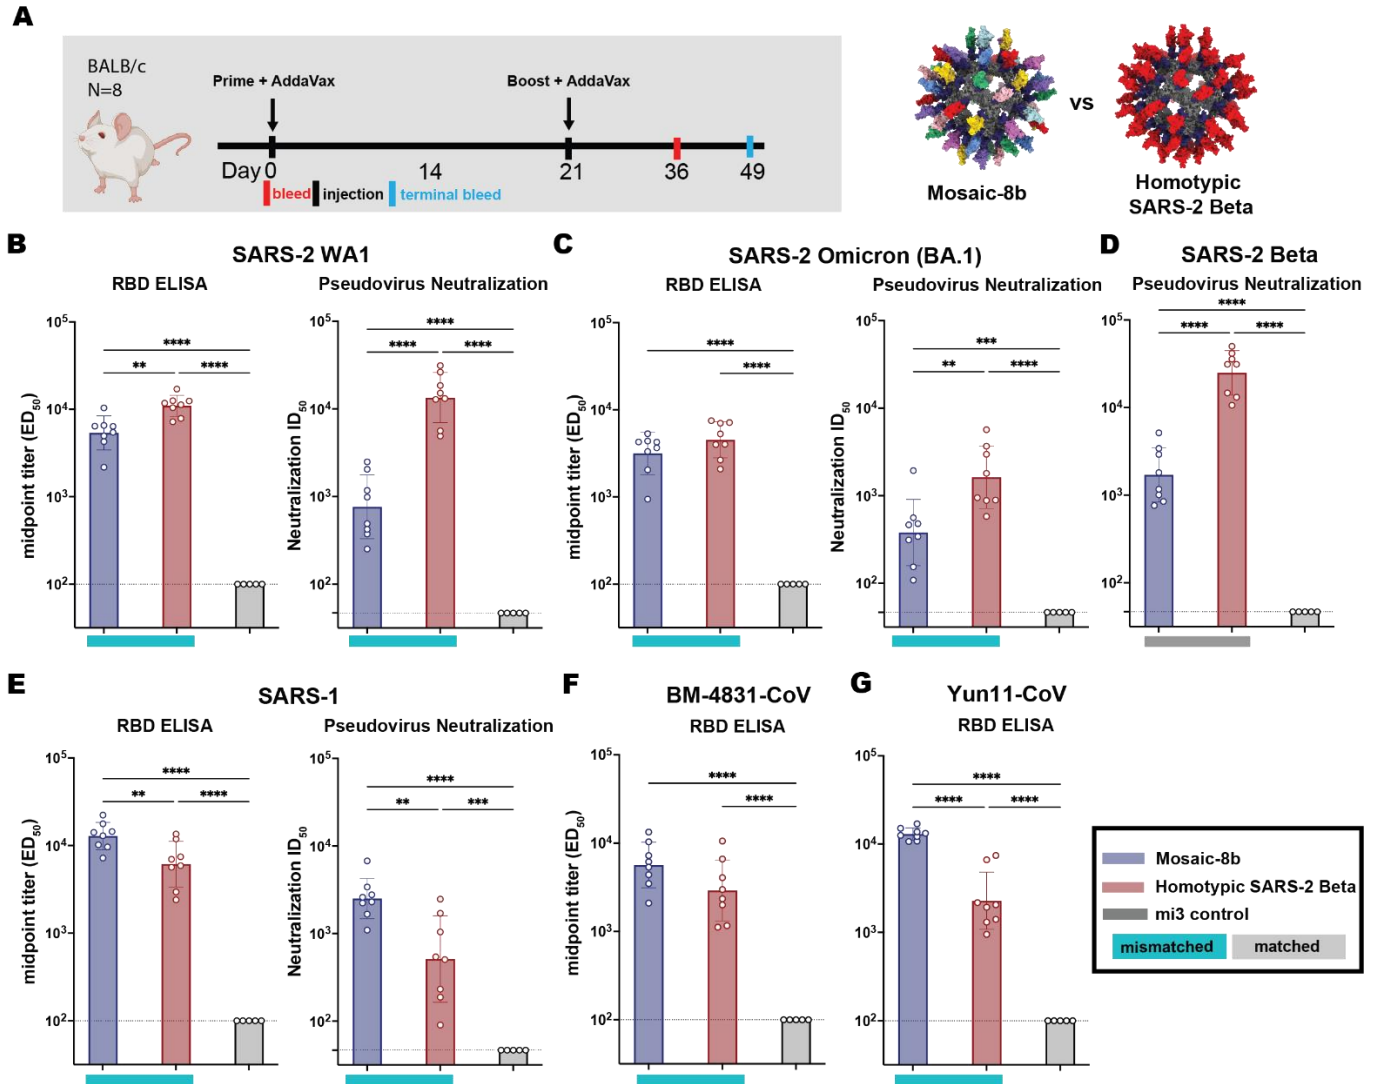

Figure S7. Mosaic-8b and homotypic SARS-2 Beta RBD-mi3 immunizations elicit binding and neutralizing antibodies in BALB/c mice. **(A)** Left: Immunization schedule. BALB/c mice were immunized with either mosaic-8 or homotypic SARS-2 Beta RBD-mi3. Right: Structural models of mosaic-8 and homotypic RBD-mi3 nanoparticles constructed using PDB 7SC1 (RBD), PDB 4MLI (SpyCatcher), and PDB 7B3Y (mi3). **(B-G)** ELISA and neutralization data for antisera (taken 4 weeks post boost) from individual mice (open circles) presented as the mean (bars) and standard deviation (horizontal lines). ELISA results are shown as midpoint titers ( $EC_{50}$  values); neutralization results are shown as half-maximal inhibitory dilutions ( $ID_{50}$  values). Dashed horizontal lines correspond to the background values representing the limit of detection. Significant differences between cohorts linked by horizontal lines are indicated by asterisks:  $p < 0.05 = *$ ,  $p < 0.01 = **$ ,  $p < 0.001 = ***$ ,  $p < 0.0001 = ****$ . Rectangles below ELISA and neutralization data indicate mismatched strains (cyan; the RBD from that strain was not present on the nanoparticle) or matched strains (gray; the RBD was present on the nanoparticle).

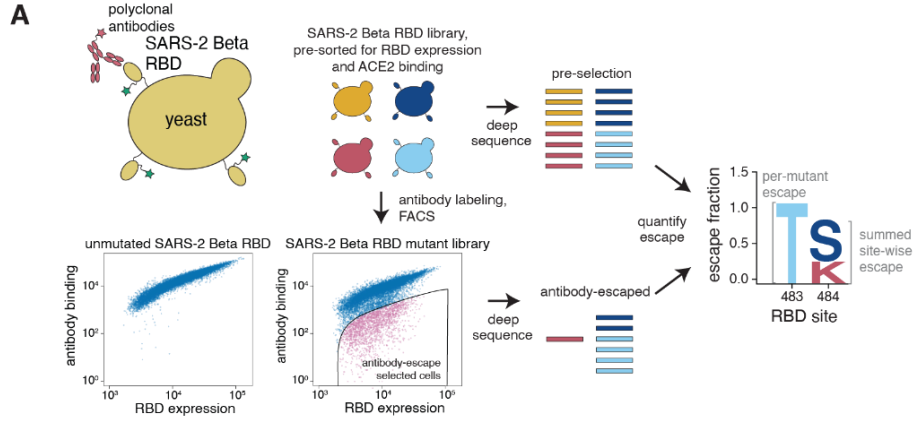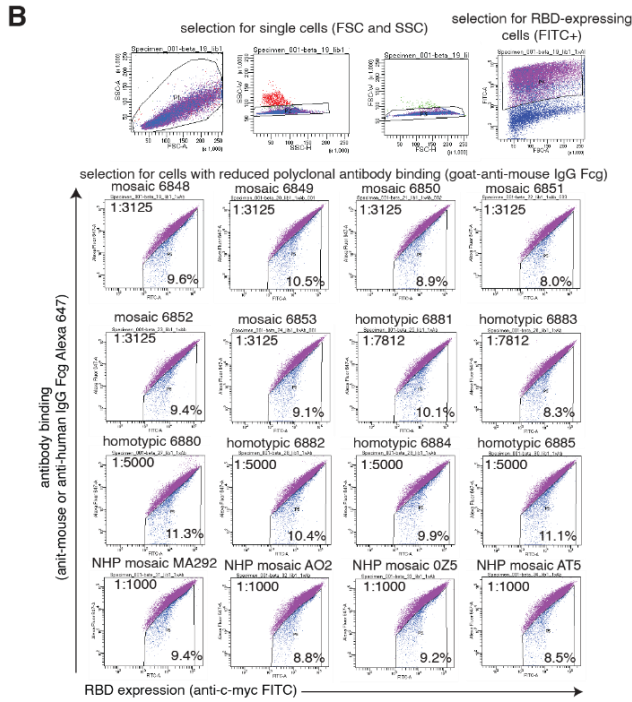

**C**

| vaccine type                 | plasma         | library          | % cells in antibody-escape gate | estimated RBD+ cells processed on sorter |          |
|------------------------------|----------------|------------------|---------------------------------|------------------------------------------|----------|
| mosaic-8b RBD                | mouse sera     | mosaic_6848      | 1                               | 9.6                                      | 875492   |
|                              |                | mosaic_6848      | 2                               | 13.6                                     | 1002826  |
|                              |                | mosaic_6849      | 1                               | 10.5                                     | 957229   |
|                              |                | mosaic_6849      | 2                               | 13.2                                     | 1100621  |
|                              |                | mosaic_6850      | 1                               | 8.9                                      | 862307   |
|                              |                | mosaic_6850      | 2                               | 10.5                                     | 938801   |
|                              |                | mosaic_6851      | 1                               | 8                                        | 751160   |
|                              |                | mosaic_6851      | 2                               | 10.3                                     | 952949   |
|                              |                | mosaic_6852      | 1                               | 9.4                                      | 896191   |
|                              |                | mosaic_6852      | 2                               | 10.7                                     | 988504   |
| homotypic RBD (Beta variant) | mouse sera     | mosaic_6853      | 1                               | 9.1                                      | 856793   |
|                              |                | mosaic_6853      | 2                               | 10.4                                     | 952068   |
|                              |                | homotypic_6881   | 1                               | 10.1                                     | 973619   |
|                              |                | homotypic_6881   | 2                               | 8.6                                      | 826391   |
|                              |                | homotypic_6883   | 1                               | 8.3                                      | 787699   |
|                              |                | homotypic_6883   | 2                               | 8.5                                      | 853705   |
|                              |                | homotypic_6880   | 1                               | 11.3                                     | 8958239  |
|                              |                | homotypic_6880   | 2                               | 9                                        | 8536533  |
|                              |                | homotypic_6882   | 1                               | 10.4                                     | 7811471  |
|                              |                | homotypic_6882   | 2                               | 8.4                                      | 8672464  |
| mosaic-8b RBD NHP sera       | NHP sera       | homotypic_6884   | 1                               | 9.9                                      | 8104919  |
|                              |                | homotypic_6884   | 2                               | 7.9                                      | 8084101  |
|                              |                | homotypic_6885   | 1                               | 11.1                                     | 8124820  |
|                              |                | homotypic_6885   | 2                               | 9                                        | 8108833  |
|                              |                | NHP_mosaic_MA292 | 1                               | 9.4                                      | 11453946 |
|                              |                | NHP_mosaic_MA292 | 2                               | 8.7                                      | 9252793  |
|                              |                | NHP_mosaic_AO2   | 1                               | 8.8                                      | 9921682  |
|                              |                | NHP_mosaic_AO2   | 2                               | 8.6                                      | 8392547  |
|                              |                | NHP_mosaic_OZ5   | 1                               | 9.2                                      | 8802152  |
|                              |                | NHP_mosaic_OZ5   | 2                               | 8.3                                      | 9675928  |
| NHP_mosaic_AT5               | NHP_mosaic_AT5 | NHP_mosaic_AT5   | 1                               | 8.5                                      | 9668012  |
|                              |                | NHP_mosaic_AT5   | 2                               | 9.6                                      | 8889219  |

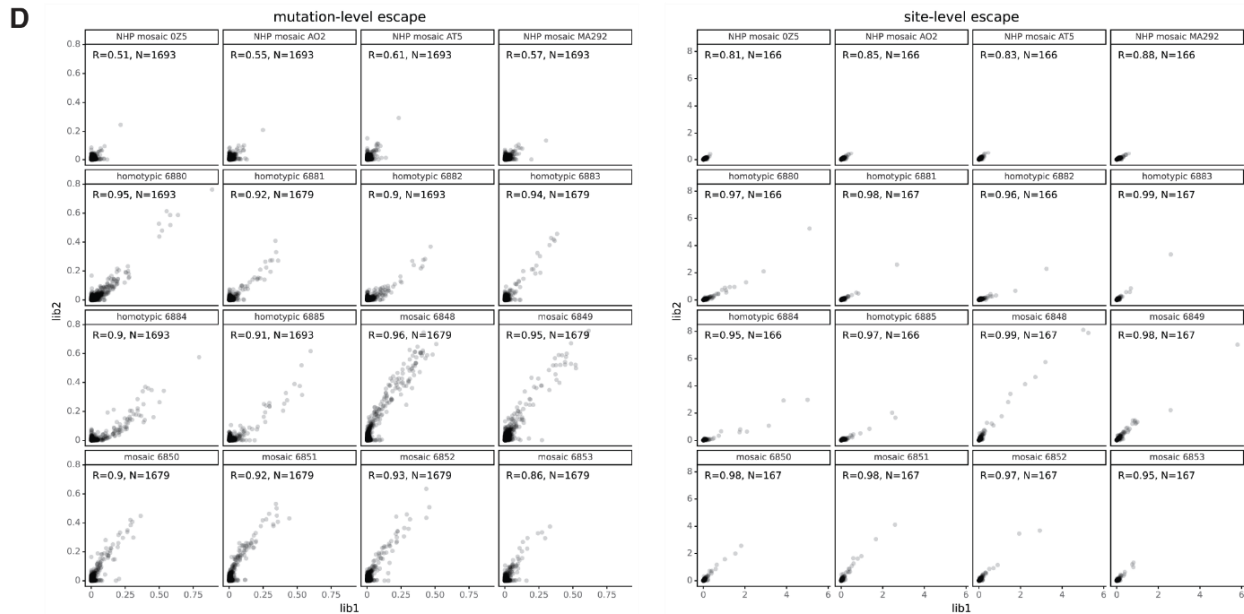

Figure S8. Comprehensive mapping of mutations that reduce binding of sera from immunized mice or NHPs to the SARS-2 Beta RBD. **(A)** Deep mutational scanning (55) was used to map mutations that reduced binding of polyclonal antibodies from immunized animals to the SARS-2 Beta RBD. A library of yeast containing nearly all possible mutations in the SARS-2 Beta RBD was incubated with sera from immunized mice or NHPs, and fluorescence-activated cell sorting (FACS) was used to enrich for cells expressing RBD (detected with a C-terminal Myc tag, green star) with reduced antibody binding, detected using an anti-mouse (for mouse sera) or anti-human (for NHP sera) IgG Fc-gamma secondary antibody. Deep sequencing was used to quantify the frequency of each mutation in the pre-selection and antibody-escape cell populations. We calculated each mutation's "escape fraction," the fraction of cells expressing RBD with that mutation that fell in the antibody-escape FACS bin (ranging from 0 to 1). The site-level escape metric is the sum of the escape fractions of all mutations at a site. **(B)** Top: Representative plots of nested FACS gating strategy used for all experiments to select for RBD+ single cells. Samples were gated by SSC-A versus FSC-A, SSC-W versus SSC-H, and FSC-W versus FSC-H) that also express RBD (FITC-A vs. FSC-A). Bottom: FACS gating strategy for one of two independent libraries to select cells expressing RBD mutants with reduced binding by polyclonal sera (cells in blue). Gates were set manually during sorting. Selection gates were set to capture cells that have a reduced amount of antibody binding for their degree of RBD expression. FACS scatter plots were qualitatively similar between the two libraries. SSC-A, side scatter-area; FSC-A, forward scatter-area; SSC-W, side scatter-width; SSC-H, side scatter-height; FSC-W, forward scatter-width; FSC-H, forward scatter height; FITC-A, fluorescein isothiocyanate-area. **(C)** The percent and number of RBD+ cells sorted into the antibody-escape gate for each library selected against each serum. **(D)** Mutation (top)- and site (bottom)-level correlations of escape scores between two independent biological replicate libraries. The complete antibody-escape scores are available in Data S3 and at [https://github.com/jbloomlab/SARS-CoV-2-RBD Beta mosaic np vaccine/blob/main/results/supp\\_data/all\\_raw\\_data.csv](https://github.com/jbloomlab/SARS-CoV-2-RBD_Beta_mosaic_np_vaccine/blob/main/results/supp_data/all_raw_data.csv).

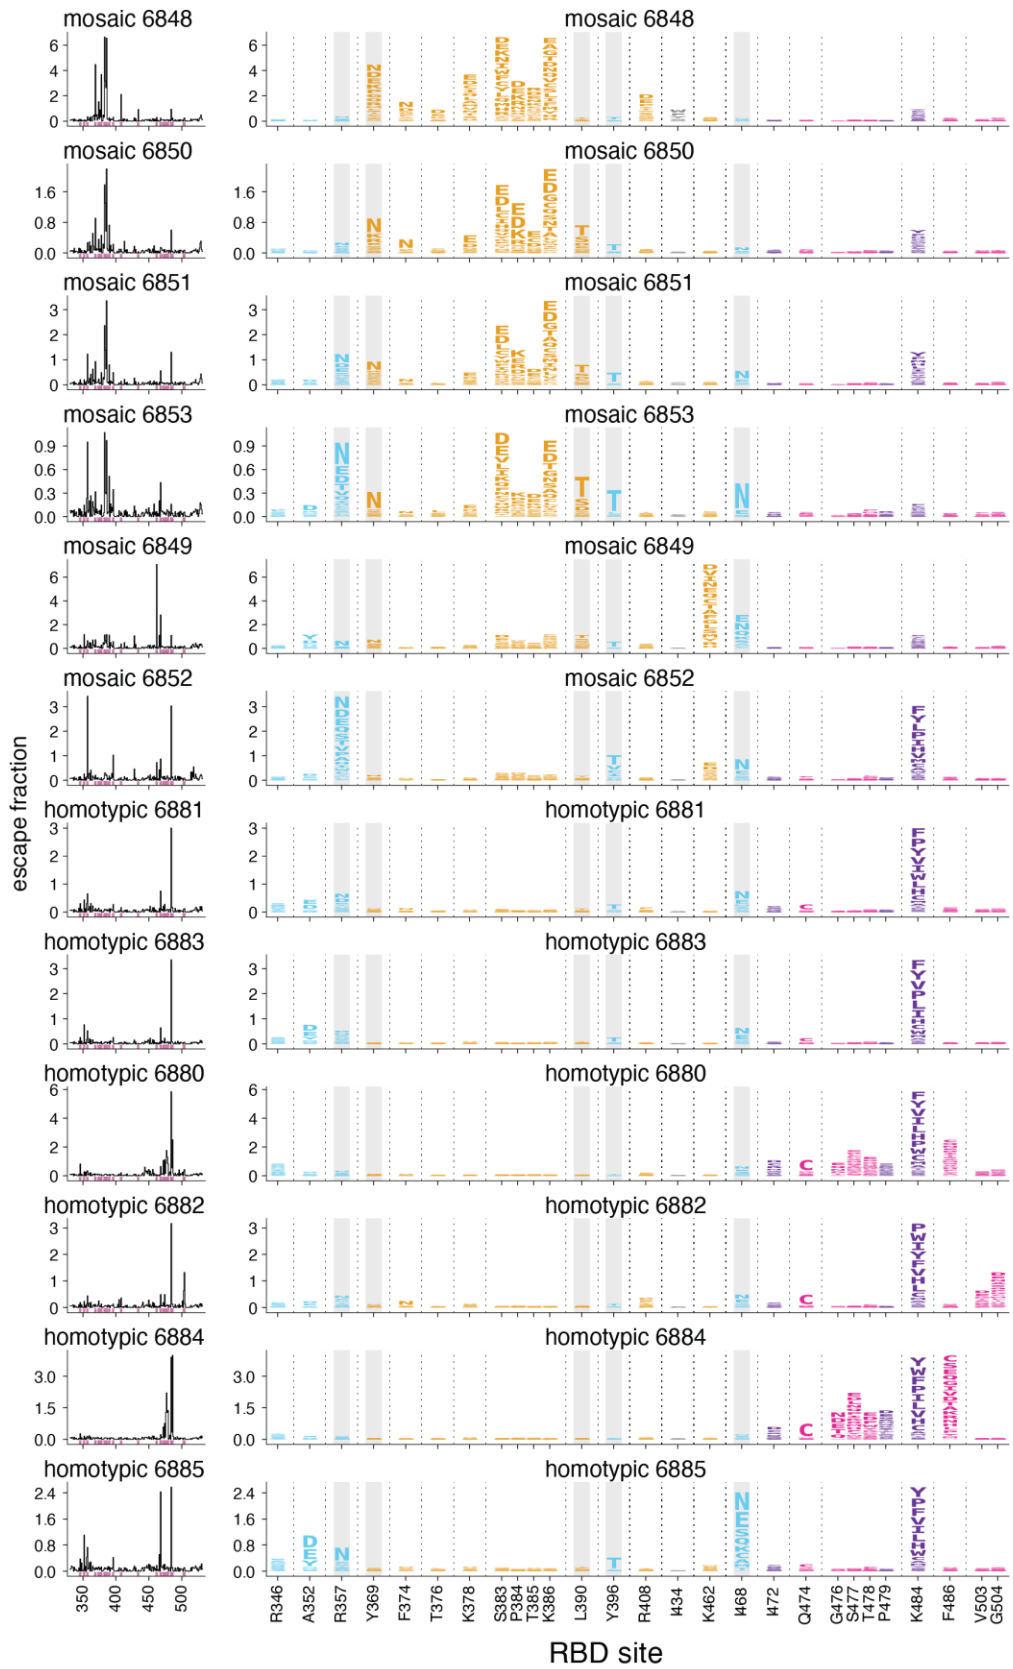

mosaic-8b RBD-mi3-  
immunized mice  
(n=6)

antibody epitope  
■ class 1  
■ class 2  
■ class 3  
■ class 4

homotypic SARS-2 Beta  
RBD-mi3-  
immunized mice  
(n=6)

Figure S9. Complete antibody-escape maps for sera from mice immunized with the mosaic 8b-RBD-mi3 (top 6) or homotypic SARS-2 Beta RBD-mi3 (bottom 6) nanoparticles. The line plots at left indicate the sum of effects of all mutations at each RBD site on antibody binding, with larger values indicating more escape. The logo plots at right show key sites where mutations disrupted antibody binding (highlighted in purple on the line plot x-axes). The height of each letter is that mutation's escape fraction. The y-axis is scaled independently for each sample. RBD sites are colored by antibody epitope, indicated at right. Sites where some mutations introduce a potential N-linked glycosylation site sequon (NxS/T) are highlighted in gray. All escape scores are in Data S3 and at [https://github.com/jbloomlab/SARS-CoV-2-RBD\\_Beta\\_mosaic\\_np\\_vaccine/blob/main/results/supp\\_data/all\\_raw\\_data.csv](https://github.com/jbloomlab/SARS-CoV-2-RBD_Beta_mosaic_np_vaccine/blob/main/results/supp_data/all_raw_data.csv). Interactive versions of logo plots and structural visualizations are at [https://jbloomlab.github.io/SARS-CoV-2-RBD\\_Beta\\_mosaic\\_np\\_vaccine/](https://jbloomlab.github.io/SARS-CoV-2-RBD_Beta_mosaic_np_vaccine/).



**A**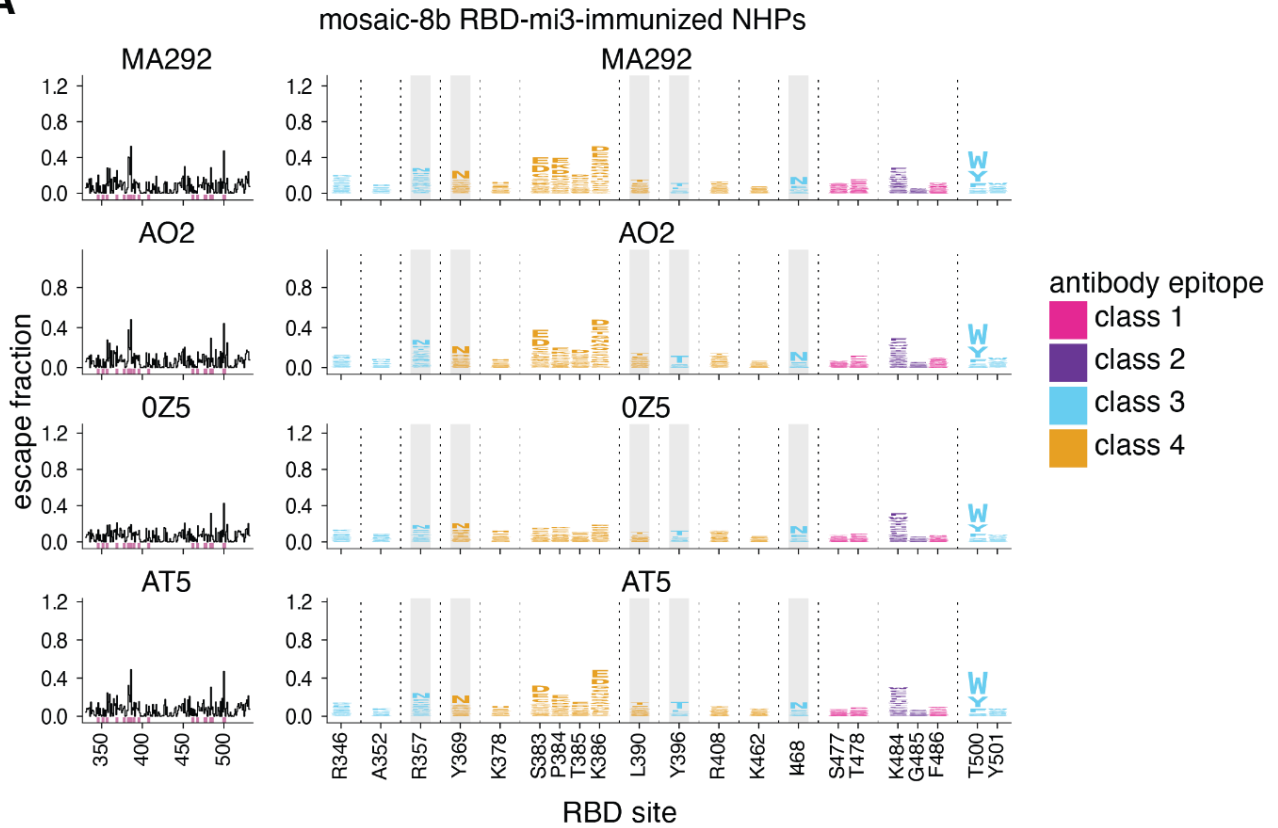**B**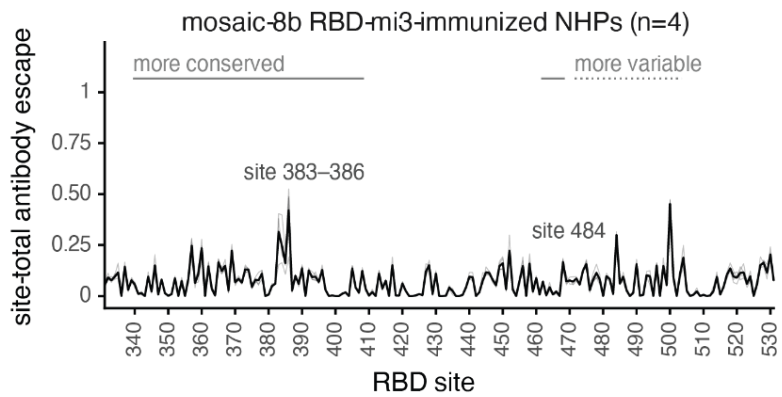**C**

mosaic-8b RBD-mi3-immunized NHPs  
site-total antibody escape, averaged across n=4 sera

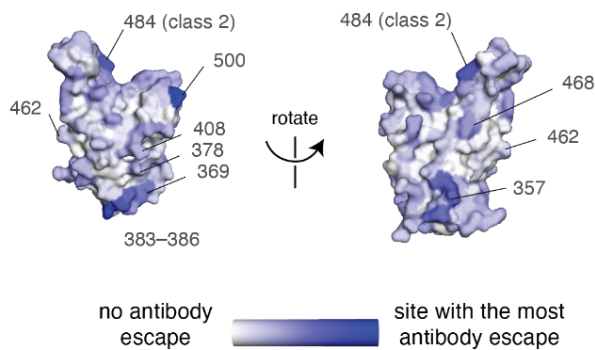

Figure S10. Complete antibody-escape maps for sera from NHPs immunized with mosaic 8b-RBD-mi3. **(A)** As in fig. S9, line plots (left) and logo plots (right) indicate the sum of the escape fractions for each mutation at a site, or mutation-level escape fractions for key sites, respectively. The y-axis is scaled independently for each sample. Sites where mutations introduce a potential N-linked glycosylation site sequon (NxS/T) are highlighted in gray. RBD sites are colored by antibody epitope, indicated in panel B. **(B)** The site-total antibody escape is averaged across n=4 sera, with the y-axis scaled as in panel A. **(C)** The average site-total antibody escape is mapped to the surface of the SARS-2 Beta RBD (PDB 7LYQ), with white indicating no escape, and blue indicating the site with the most antibody escape. Key sites are labeled, and labels are colored by antibody class. All escape scores are in Data S3 and at [https://github.com/jbloomlab/SARS-CoV-2-RBD\\_Beta\\_mosaic\\_np\\_vaccine/blob/main/results/supp\\_data/all\\_raw\\_data.csv](https://github.com/jbloomlab/SARS-CoV-2-RBD_Beta_mosaic_np_vaccine/blob/main/results/supp_data/all_raw_data.csv). Interactive versions of logo plots and structural visualizations are at [https://jbloomlab.github.io/SARS-CoV-2-RBD\\_Beta\\_mosaic\\_np\\_vaccine/](https://jbloomlab.github.io/SARS-CoV-2-RBD_Beta_mosaic_np_vaccine/).

## References and Notes

1. C. Zheng, W. Shao, X. Chen, B. Zhang, G. Wang, W. Zhang, Real-world effectiveness of COVID-19 vaccines: A literature review and meta-analysis. *Int. J. Infect. Dis.* **114**, 252–260 (2022). [doi:10.1016/j.ijid.2021.11.009](https://doi.org/10.1016/j.ijid.2021.11.009) [Medline](#)
2. D. Planas, T. Bruel, L. Grzelak, F. Guivel-Benhassine, I. Staropoli, F. Porrot, C. Planchais, J. Buchrieser, M. M. Rajah, E. Bishop, M. Albert, F. Donati, M. Prot, S. Behillil, V. Enouf, M. Maquart, M. Smati-Lafarge, E. Varon, F. Schortgen, L. Yahyaoui, M. Gonzalez, J. De Sèze, H. Péré, D. Veyer, A. Sève, E. Simon-Lorière, S. Fafi-Kremer, K. Stefic, H. Mouquet, L. Hocqueloux, S. van der Werf, T. Prazuck, O. Schwartz, Sensitivity of infectious SARS-CoV-2 B.1.1.7 and B.1.351 variants to neutralizing antibodies. *Nat. Med.* **27**, 917–924 (2021). [doi:10.1038/s41591-021-01318-5](https://doi.org/10.1038/s41591-021-01318-5) [Medline](#)
3. N. L. Washington, K. Gangavarapu, M. Zeller, A. Bolze, E. T. Cirulli, K. M. Schiabor Barrett, B. B. Larsen, C. Anderson, S. White, T. Cassens, S. Jacobs, G. Levan, J. Nguyen, J. M. Ramirez 3rd, C. Rivera-Garcia, E. Sandoval, X. Wang, D. Wong, E. Spencer, R. Robles-Sikisaka, E. Kurzban, L. D. Hughes, X. Deng, C. Wang, V. Servellita, H. Valentine, P. De Hoff, P. Seaver, S. Sathe, K. Gietzen, B. Sickler, J. Antico, K. Hoon, J. Liu, A. Harding, O. Bakhtar, T. Basler, B. Austin, D. MacCannell, M. Isaksson, P. G. Febbo, D. Becker, M. Laurent, E. McDonald, G. W. Yeo, R. Knight, L. C. Laurent, E. de Feo, M. Worobey, C. Y. Chiu, M. A. Suchard, J. T. Lu, W. Lee, K. G. Andersen, Emergence and rapid transmission of SARS-CoV-2 B.1.1.7 in the United States. *Cell* **184**, 2587–2594.e7 (2021). [doi:10.1016/j.cell.2021.03.052](https://doi.org/10.1016/j.cell.2021.03.052) [Medline](#)
4. T. K. Burki, Omicron variant and booster COVID-19 vaccines. *Lancet Respir. Med.* **10**, e17 (2022). [doi:10.1016/S2213-2600\(21\)00559-2](https://doi.org/10.1016/S2213-2600(21)00559-2) [Medline](#)
5. L. Liu, S. Iketani, Y. Guo, J. F.-W. Chan, M. Wang, L. Liu, Y. Luo, H. Chu, Y. Huang, M. S. Nair, J. Yu, K. K.-H. Chik, T. T.-T. Yuen, C. Yoon, K. K.-W. To, H. Chen, M. T. Yin, M. E. Sobieszczyk, Y. Huang, H. H. Wang, Z. Sheng, K.-Y. Yuen, D. D. Ho, Striking antibody evasion manifested by the Omicron variant of SARS-CoV-2. *Nature* **602**, 676–681 (2022). [doi:10.1038/s41586-021-04388-0](https://doi.org/10.1038/s41586-021-04388-0) [Medline](#)
6. D. Yamasoba *et al.*, Virological characteristics of SARS-CoV-2 BA.2 variant. bioRxiv 480335 [Preprint] (2022); [doi:10.1101/2022.02.14.480335](https://doi.org/10.1101/2022.02.14.480335).
7. F. Konings, M. D. Perkins, J. H. Kuhn, M. J. Pallen, E. J. Alm, B. N. Archer, A. Barakat, T. Bedford, J. N. Bhiman, L. Caly, L. L. Carter, A. Cullinane, T. de Oliveira, J. Druce, I. El Masry, R. Evans, G. F. Gao, A. E. Gorbalenya, E. Hamblion, B. L. Herring, E. Hodcroft, E. C. Holmes, M. Kakkar, S. Khare, M. P. G. Koopmans, B. Korber, J. Leite, D. MacCannell, M. Marklewitz, S. Maurer-Stroh, J. A. M. Rico, V. J. Munster, R. Neher, B. O. Munnink, B. I. Pavlin, M. Peiris, L. Poon, O. Pybus, A. Rambaut, P. Resende, L. Subissi, V. Thiel, S. Tong, S. van der Werf, A. von Gottberg, J. Ziebuhr, M. D. Van Kerkhove, SARS-CoV-2 Variants of Interest and Concern naming scheme conducive for global discourse. *Nat. Microbiol.* **6**, 821–823 (2021). [doi:10.1038/s41564-021-00932-w](https://doi.org/10.1038/s41564-021-00932-w) [Medline](#)
8. S. Alkhovsky, S. Lenshin, A. Romashin, T. Vishnevskaya, O. Vyshemirsky, Y. Bulycheva, D. Lvov, A. Gitelman, SARS-like Coronaviruses in Horseshoe Bats (*Rhinolophus* spp.) in Russia, 2020. *Viruses* **14**, 113 (2022). [doi:10.3390/v14010113](https://doi.org/10.3390/v14010113) [Medline](#)

9. D. Delaune, V. Hul, E. A. Karlsson, A. Hassanin, T. P. Ou, A. Baidaliuk, F. Gámbaro, M. Prot, V. T. Tu, S. Chea, L. Keatts, J. Mazet, C. K. Johnson, P. Buchy, P. Dussart, T. Goldstein, E. Simon-Lorière, V. Duong, A novel SARS-CoV-2 related coronavirus in bats from Cambodia. *Nat. Commun.* **12**, 6563 (2021). [doi:10.1038/s41467-021-26809-4](https://doi.org/10.1038/s41467-021-26809-4) [Medline](#)
10. H. Zhou, J. Ji, X. Chen, Y. Bi, J. Li, Q. Wang, T. Hu, H. Song, R. Zhao, Y. Chen, M. Cui, Y. Zhang, A. C. Hughes, E. C. Holmes, W. Shi, Identification of novel bat coronaviruses sheds light on the evolutionary origins of SARS-CoV-2 and related viruses. *Cell* **184**, 4380–4391.e14 (2021). [doi:10.1016/j.cell.2021.06.008](https://doi.org/10.1016/j.cell.2021.06.008) [Medline](#)
11. S. Wacharapluesadee, C. W. Tan, P. Maneern, P. Duengkae, F. Zhu, Y. Joyjinda, T. Kaewpom, W. N. Chia, W. Ampoot, B. L. Lim, K. Worachotsueptrakun, V. C.-W. Chen, N. Sirichan, C. Ruchisrisarod, A. Rodpan, K. Noradechanon, T. Phaichana, N. Jantarat, B. Thongnumchaima, C. Tu, G. Cramer, M. M. Stokes, T. Hemachudha, L.-F. Wang, Evidence for SARS-CoV-2 related coronaviruses circulating in bats and pangolins in Southeast Asia. *Nat. Commun.* **12**, 972 (2021). [doi:10.1038/s41467-021-21240-1](https://doi.org/10.1038/s41467-021-21240-1) [Medline](#)
12. S. N. Seifert, M. C. Letko, A sarbecovirus found in Russian bats uses human ACE2. bioRxiv 471310 [Preprint] (2021); doi:10.1101/2021.12.05.471310.
13. T. N. Starr, S. K. Zepeda, A. C. Walls, A. J. Greaney, S. Alkhovsky, D. Veessler, J. D. Bloom, ACE2 binding is an ancestral and evolvable trait of sarbecoviruses. *Nature* **603**, 913–918 (2022). [doi:10.1038/s41586-022-04464-z](https://doi.org/10.1038/s41586-022-04464-z) [Medline](#)
14. M. Letko, A. Marzi, V. Munster, Functional assessment of cell entry and receptor usage for SARS-CoV-2 and other lineage B betacoronaviruses. *Nat. Microbiol.* **5**, 562–569 (2020). [doi:10.1038/s41564-020-0688-y](https://doi.org/10.1038/s41564-020-0688-y) [Medline](#)
15. T. S. Fung, D. X. Liu, Human Coronavirus: Host-Pathogen Interaction. *Annu. Rev. Microbiol.* **73**, 529–557 (2019). [doi:10.1146/annurev-micro-020518-115759](https://doi.org/10.1146/annurev-micro-020518-115759) [Medline](#)
16. P. J. M. Brouwer, T. G. Caniels, K. van der Straten, J. L. Snitselaar, Y. Aldon, S. Bangaru, J. L. Torres, N. M. A. Okba, M. Claireaux, G. Kerster, A. E. H. Bentlage, M. M. van Haaren, D. Guerra, J. A. Burger, E. E. Schermer, K. D. Verheul, N. van der Velde, A. van der Kooi, J. van Schooten, M. J. van Breemen, T. P. L. Bijl, K. Sliepen, A. Aartse, R. Derking, I. Bontjer, N. A. Kootstra, W. J. Wiersinga, G. Vidarsson, B. L. Haagmans, A. B. Ward, G. J. de Bree, R. W. Sanders, M. J. van Gils, Potent neutralizing antibodies from COVID-19 patients define multiple targets of vulnerability. *Science* **369**, 643–650 (2020). [doi:10.1126/science.abc5902](https://doi.org/10.1126/science.abc5902) [Medline](#)
17. Y. Cao, B. Su, X. Guo, W. Sun, Y. Deng, L. Bao, Q. Zhu, X. Zhang, Y. Zheng, C. Geng, X. Chai, R. He, X. Li, Q. Lv, H. Zhu, W. Deng, Y. Xu, Y. Wang, L. Qiao, Y. Tan, L. Song, G. Wang, X. Du, N. Gao, J. Liu, J. Xiao, X. D. Su, Z. Du, Y. Feng, C. Qin, C. Qin, R. Jin, X. S. Xie, Potent neutralizing antibodies against SARS-CoV-2 identified by high-throughput single-cell sequencing of convalescent patients' B cells. *Cell* **182**, 73–84.e16 (2020). [doi:10.1016/j.cell.2020.05.025](https://doi.org/10.1016/j.cell.2020.05.025) [Medline](#)
18. C. Kreer, M. Zehner, T. Weber, M. S. Ercanoglu, L. Gieselmann, C. Rohde, S. Halwe, M. Korenkov, P. Schommers, K. Vanshylla, V. Di Cristanziano, H. Janicki, R. Brinker, A. Ashurov, V. Krähling, A. Kupke, H. Cohen-Dvashi, M. Koch, J. M. Eckert, S. Lederer, N. Pfeifer, T. Wolf, M. J. G. T. Vehreschild, C. Wendtner, R. Diskin, H. Gruell, S.

- Becker, F. Klein, Longitudinal Isolation of Potent Near-Germline SARS-CoV-2-Neutralizing Antibodies from COVID-19 Patients. *Cell* **182**, 843–854.e12 (2020). [doi:10.1016/j.cell.2020.06.044](https://doi.org/10.1016/j.cell.2020.06.044) [Medline](#)
19. L. Liu, P. Wang, M. S. Nair, J. Yu, M. Rapp, Q. Wang, Y. Luo, J. F.-W. Chan, V. Sahi, A. Figueroa, X. V. Guo, G. Cerutti, J. Bimela, J. Gorman, T. Zhou, Z. Chen, K.-Y. Yuen, P. D. Kwong, J. G. Sodroski, M. T. Yin, Z. Sheng, Y. Huang, L. Shapiro, D. D. Ho, Potent neutralizing antibodies against multiple epitopes on SARS-CoV-2 spike. *Nature* **584**, 450–456 (2020). [doi:10.1038/s41586-020-2571-7](https://doi.org/10.1038/s41586-020-2571-7) [Medline](#)
  20. D. F. Robbiani, C. Gaebler, F. Muecksch, J. C. C. Lorenzi, Z. Wang, A. Cho, M. Agudelo, C. O. Barnes, A. Gazumyan, S. Finkin, T. Hägglöf, T. Y. Oliveira, C. Viant, A. Hurley, H.-H. Hoffmann, K. G. Millard, R. G. Kost, M. Cipolla, K. Gordon, F. Bianchini, S. T. Chen, V. Ramos, R. Patel, J. Dizon, I. Shimeliovich, P. Mendoza, H. Hartweg, L. Nogueira, M. Pack, J. Horowitz, F. Schmidt, Y. Weisblum, E. Michailidis, A. W. Ashbrook, E. Waltari, J. E. Pak, K. E. Huey-Tubman, N. Koranda, P. R. Hoffman, A. P. West Jr., C. M. Rice, T. Hatziioannou, P. J. Bjorkman, P. D. Bieniasz, M. Caskey, M. C. Nussenzweig, Convergent antibody responses to SARS-CoV-2 in convalescent individuals. *Nature* **584**, 437–442 (2020). [doi:10.1038/s41586-020-2456-9](https://doi.org/10.1038/s41586-020-2456-9) [Medline](#)
  21. R. Shi, C. Shan, X. Duan, Z. Chen, P. Liu, J. Song, T. Song, X. Bi, C. Han, L. Wu, G. Gao, X. Hu, Y. Zhang, Z. Tong, W. Huang, W. J. Liu, G. Wu, B. Zhang, L. Wang, J. Qi, H. Feng, F.-S. Wang, Q. Wang, G. F. Gao, Z. Yuan, J. Yan, A human neutralizing antibody targets the receptor-binding site of SARS-CoV-2. *Nature* **584**, 120–124 (2020). [doi:10.1038/s41586-020-2381-y](https://doi.org/10.1038/s41586-020-2381-y) [Medline](#)
  22. S. J. Zost, P. Gilchuk, R. E. Chen, J. B. Case, J. X. Reidy, A. Trivette, R. S. Nargi, R. E. Sutton, N. Suryadevara, E. C. Chen, E. Binshtein, S. Shrihari, M. Ostrowski, H. Y. Chu, J. E. Didier, K. W. MacRenaris, T. Jones, S. Day, L. Myers, F. Eun-Hyung Lee, D. C. Nguyen, I. Sanz, D. R. Martinez, P. W. Rothlauf, L.-M. Bloyet, S. P. J. Whelan, R. S. Baric, L. B. Thackray, M. S. Diamond, R. H. Carnahan, J. E. Crowe Jr., Rapid isolation and profiling of a diverse panel of human monoclonal antibodies targeting the SARS-CoV-2 spike protein. *Nat. Med.* **26**, 1422–1427 (2020). [doi:10.1038/s41591-020-0998-x](https://doi.org/10.1038/s41591-020-0998-x) [Medline](#)
  23. T. F. Rogers, F. Zhao, D. Huang, N. Beutler, A. Burns, W. T. He, O. Limbo, C. Smith, G. Song, J. Woehl, L. Yang, R. K. Abbott, S. Callaghan, E. Garcia, J. Hurtado, M. Parren, L. Peng, S. Ramirez, J. Ricketts, M. J. Ricciardi, S. A. Rawlings, N. C. Wu, M. Yuan, D. M. Smith, D. Nemazee, J. R. Teijaro, J. E. Voss, I. A. Wilson, R. Andrabi, B. Briney, E. Landais, D. Sok, J. G. Jardine, D. R. Burton, Isolation of potent SARS-CoV-2 neutralizing antibodies and protection from disease in a small animal model. *Science* **369**, 956–963 (2020). [doi:10.1126/science.abc7520](https://doi.org/10.1126/science.abc7520) [Medline](#)
  24. E. Seydoux, L. J. Homad, A. J. MacCamy, K. R. Parks, N. K. Hurlburt, M. F. Jennewein, N. R. Akins, A. B. Stuart, Y.-H. Wan, J. Feng, R. E. Whaley, S. Singh, M. Boeckh, K. W. Cohen, M. J. McElrath, J. A. Englund, H. Y. Chu, M. Pancera, A. T. McGuire, L. Stamatatos, Analysis of a SARS-CoV-2-Infected Individual Reveals Development of Potent Neutralizing Antibodies with Limited Somatic Mutation. *Immunity* **53**, 98–105.e5 (2020). [doi:10.1016/j.immuni.2020.06.001](https://doi.org/10.1016/j.immuni.2020.06.001) [Medline](#)

25. S. J. Zost, P. Gilchuk, J. B. Case, E. Binshtein, R. E. Chen, J. P. Nkolola, A. Schäfer, J. X. Reidy, A. Trivette, R. S. Nargi, R. E. Sutton, N. Suryadevara, D. R. Martinez, L. E. Williamson, E. C. Chen, T. Jones, S. Day, L. Myers, A. O. Hassan, N. M. Kafai, E. S. Winkler, J. M. Fox, S. Shrihari, B. K. Mueller, J. Meiler, A. Chandrashekar, N. B. Mercado, J. J. Steinhardt, K. Ren, Y.-M. Loo, N. L. Kallewaard, B. T. McCune, S. P. Keeler, M. J. Holtzman, D. H. Barouch, L. E. Gralinski, R. S. Baric, L. B. Thackray, M. S. Diamond, R. H. Carnahan, J. E. Crowe Jr., Potently neutralizing and protective human antibodies against SARS-CoV-2. *Nature* **584**, 443–449 (2020). [doi:10.1038/s41586-020-2548-6](https://doi.org/10.1038/s41586-020-2548-6) [Medline](#)
26. C. O. Barnes, C. A. Jette, M. E. Abernathy, K. A. Dam, S. R. Esswein, H. B. Gristick, A. G. Malyutin, N. G. Sharaf, K. E. Huey-Tubman, Y. E. Lee, D. F. Robbiani, M. C. Nussenzweig, A. P. West Jr., P. J. Bjorkman, SARS-CoV-2 neutralizing antibody structures inform therapeutic strategies. *Nature* **588**, 682–687 (2020). [doi:10.1038/s41586-020-2852-1](https://doi.org/10.1038/s41586-020-2852-1) [Medline](#)
27. D. Pinto, Y.-J. Park, M. Beltramello, A. C. Walls, M. A. Tortorici, S. Bianchi, S. Jaconi, K. Culap, F. Zatta, A. De Marco, A. Peter, B. Guarino, R. Spreafico, E. Cameroni, J. B. Case, R. E. Chen, C. Havenar-Daughton, G. Snell, A. Telenti, H. W. Virgin, A. Lanzavecchia, M. S. Diamond, K. Fink, D. Veessler, D. Corti, Cross-neutralization of SARS-CoV-2 by a human monoclonal SARS-CoV antibody. *Nature* **583**, 290–295 (2020). [doi:10.1038/s41586-020-2349-y](https://doi.org/10.1038/s41586-020-2349-y) [Medline](#)
28. L. Piccoli, Y.-J. Park, M. A. Tortorici, N. Czudnochowski, A. C. Walls, M. Beltramello, C. Silacci-Fregni, D. Pinto, L. E. Rosen, J. E. Bowen, O. J. Acton, S. Jaconi, B. Guarino, A. Minola, F. Zatta, N. Sprugasci, J. Bassi, A. Peter, A. De Marco, J. C. Nix, F. Mele, S. Jovic, B. F. Rodriguez, S. V. Gupta, F. Jin, G. Piumatti, G. Lo Presti, A. F. Pellanda, M. Biggiogero, M. Tarkowski, M. S. Pizzuto, E. Cameroni, C. Havenar-Daughton, M. Smithey, D. Hong, V. Lepori, E. Albanese, A. Ceschi, E. Bernasconi, L. Elzi, P. Ferrari, C. Garzoni, A. Riva, G. Snell, F. Sallusto, K. Fink, H. W. Virgin, A. Lanzavecchia, D. Corti, D. Veessler, Mapping neutralizing and immunodominant sites on the SARS-CoV-2 spike receptor-binding domain by structure-guided high-resolution serology. *Cell* **183**, 1024–1042.e21 (2020). [doi:10.1016/j.cell.2020.09.037](https://doi.org/10.1016/j.cell.2020.09.037) [Medline](#)
29. Z. Wang, F. Schmidt, Y. Weisblum, F. Muecksch, C. O. Barnes, S. Finkin, D. Schaefer-Babajew, M. Cipolla, C. Gaebler, J. A. Lieberman, T. Y. Oliveira, Z. Yang, M. E. Abernathy, K. E. Huey-Tubman, A. Hurley, M. Turroja, K. A. West, K. Gordon, K. G. Millard, V. Ramos, J. Da Silva, J. Xu, R. A. Colbert, R. Patel, J. Dizon, C. Unson-O'Brien, I. Shimeliovich, A. Gazumyan, M. Caskey, P. J. Bjorkman, R. Casellas, T. Hatziioannou, P. D. Bieniasz, M. C. Nussenzweig, mRNA vaccine-elicited antibodies to SARS-CoV-2 and circulating variants. *Nature* **592**, 616–622 (2021). [doi:10.1038/s41586-021-03324-6](https://doi.org/10.1038/s41586-021-03324-6) [Medline](#)
30. H. Kleanthous, J. M. Silverman, K. W. Makar, I.-K. Yoon, N. Jackson, D. W. Vaughn, Scientific rationale for developing potent RBD-based vaccines targeting COVID-19. *NPJ Vaccines* **6**, 128 (2021). [doi:10.1038/s41541-021-00393-6](https://doi.org/10.1038/s41541-021-00393-6) [Medline](#)
31. H. Liu, N. C. Wu, M. Yuan, S. Bangaru, J. L. Torres, T. G. Caniels, J. van Schooten, X. Zhu, C. D. Lee, P. J. M. Brouwer, M. J. van Gils, R. W. Sanders, A. B. Ward, I. A. Wilson, Cross-Neutralization of a SARS-CoV-2 Antibody to a Functionally Conserved Site Is

- Mediated by Avidity. *Immunity* **53**, 1272–1280.e5 (2020).  
[doi:10.1016/j.immuni.2020.10.023](https://doi.org/10.1016/j.immuni.2020.10.023) [Medline](#)
32. C. A. Jette, A. A. Cohen, P. N. P. Gnanapragasam, F. Muecksch, Y. E. Lee, K. E. Huey-Tubman, F. Schmidt, T. Hatzioannou, P. D. Bieniasz, M. C. Nussenzweig, A. P. West Jr., J. R. Keeffe, P. J. Bjorkman, C. O. Barnes, Broad cross-reactivity across sarbecoviruses exhibited by a subset of COVID-19 donor-derived neutralizing antibodies. *Cell Rep.* **36**, 109760 (2021). [doi:10.1016/j.celrep.2021.109760](https://doi.org/10.1016/j.celrep.2021.109760) [Medline](#)
  33. D. L. Burnett, K. J. L. Jackson, D. B. Langley, A. Aggrawal, A. O. Stella, M. D. Johansen, H. Balachandran, H. Lenthall, R. Rouet, G. Walker, B. M. Saunders, M. Singh, H. Li, J. Y. Henry, J. Jackson, A. G. Stewart, F. Witthauer, M. A. Spence, N. G. Hansbro, C. Jackson, P. Schofield, C. Milthorpe, M. Martinello, S. R. Schulz, E. Roth, A. Kelleher, S. Emery, W. J. Britton, W. D. Rawlinson, R. Karl, S. Schäfer, T. H. Winkler, R. Brink, R. A. Bull, P. M. Hansbro, H.-M. Jäck, S. Turville, D. Christ, C. C. Goodnow, Immunizations with diverse sarbecovirus receptor-binding domains elicit SARS-CoV-2 neutralizing antibodies against a conserved site of vulnerability. *Immunity* **54**, 2908–2921.e6 (2021). [doi:10.1016/j.immuni.2021.10.019](https://doi.org/10.1016/j.immuni.2021.10.019) [Medline](#)
  34. A. A. Cohen, P. N. P. Gnanapragasam, Y. E. Lee, P. R. Hoffman, S. Ou, L. M. Kakutani, J. R. Keeffe, H.-J. Wu, M. Howarth, A. P. West, C. O. Barnes, M. C. Nussenzweig, P. J. Bjorkman, Mosaic nanoparticles elicit cross-reactive immune responses to zoonotic coronaviruses in mice. *Science* **371**, 735–741 (2021). [doi:10.1126/science.abf6840](https://doi.org/10.1126/science.abf6840) [Medline](#)
  35. L. Bongini, D. Fanelli, F. Piazza, P. De Los Rios, M. Sanner, U. Skoglund, A dynamical study of antibody-antigen encounter reactions. *Phys. Biol.* **4**, 172–180 (2007).  
[doi:10.1088/1478-3975/4/3/004](https://doi.org/10.1088/1478-3975/4/3/004) [Medline](#)
  36. T. K. Tan, P. Rijal, R. Rahikainen, A. H. Keeble, L. Schimanski, S. Hussain, R. Harvey, J. W. P. Hayes, J. C. Edwards, R. K. McLean, V. Martini, M. Pedrera, N. Thakur, C. Conceicao, I. Dietrich, H. Shelton, A. Ludi, G. Wilsden, C. Browning, A. K. Zagrajek, D. Bialy, S. Bhat, P. Stevenson-Leggett, P. Hollinghurst, M. Tully, K. Moffat, C. Chiu, R. Waters, A. Gray, M. Azhar, V. Mioulet, J. Newman, A. S. Asfor, A. Burman, S. Crossley, J. A. Hammond, E. Tchilian, B. Charleston, D. Bailey, T. J. Tuthill, S. P. Graham, H. M. E. Duyvesteyn, T. Malinauskas, J. Huo, J. A. Tree, K. R. Buttigieg, R. J. Owens, M. W. Carroll, R. S. Daniels, J. W. McCauley, D. I. Stuart, K. A. Huang, M. Howarth, A. R. Townsend, A COVID-19 vaccine candidate using SpyCatcher multimerization of the SARS-CoV-2 spike protein receptor-binding domain induces potent neutralising antibody responses. *Nat. Commun.* **12**, 542 (2021).  
[doi:10.1038/s41467-020-20654-7](https://doi.org/10.1038/s41467-020-20654-7) [Medline](#)
  37. K. D. Brune, D. B. Leneghan, I. J. Brian, A. S. Ishizuka, M. F. Bachmann, S. J. Draper, S. Biswas, M. Howarth, Plug-and-Display: Decoration of Virus-Like Particles via isopeptide bonds for modular immunization. *Sci. Rep.* **6**, 19234 (2016).  
[doi:10.1038/srep19234](https://doi.org/10.1038/srep19234) [Medline](#)
  38. B. Zakeri, J. O. Fierer, E. Celik, E. C. Chittock, U. Schwarz-Linek, V. T. Moy, M. Howarth, Peptide tag forming a rapid covalent bond to a protein, through engineering a bacterial

- adhesin. *Proc. Natl. Acad. Sci. U.S.A.* **109**, E690–E697 (2012).  
[doi:10.1073/pnas.1115485109](https://doi.org/10.1073/pnas.1115485109) [Medline](#)
39. A. H. Keeble, P. Turkki, S. Stokes, I. N. A. Khairil Anuar, R. Rahikainen, V. P. Hytönen, M. Howarth, Approaching infinite affinity through engineering of peptide-protein interaction. *Proc. Natl. Acad. Sci. U.S.A.* **116**, 26523–26533 (2019).  
[doi:10.1073/pnas.1909653116](https://doi.org/10.1073/pnas.1909653116) [Medline](#)
40. A. M. Davidson, J. Wysocki, D. Battle, Interaction of SARS-CoV-2 and Other Coronavirus With ACE (Angiotensin-Converting Enzyme)-2 as Their Main Receptor: Therapeutic Implications. *Hypertension* **76**, 1339–1349 (2020).  
[doi:10.1161/HYPERTENSIONAHA.120.15256](https://doi.org/10.1161/HYPERTENSIONAHA.120.15256) [Medline](#)
41. W. Dong, H. Mead, L. Tian, J.-G. Park, J. I. Garcia, S. Jaramillo, T. Barr, D. S. Kollath, V. K. Coyne, N. E. Stone, A. Jones, J. Zhang, A. Li, L.-S. Wang, M. Milanes-Yearsley, J. B. Torrelles, L. Martinez-Sobrido, P. S. Keim, B. M. Barker, M. A. Caligiuri, J. Yu, The K18-Human ACE2 Transgenic Mouse Model Recapitulates Non-severe and Severe COVID-19 in Response to an Infectious Dose of the SARS-CoV-2 Virus. *J. Virol.* **96**, e0096421 (2022). [doi:10.1128/JVI.00964-21](https://doi.org/10.1128/JVI.00964-21) [Medline](#)
42. C. K. Yinda, J. R. Port, T. Bushmaker, I. Offei Owusu, J. N. Purushotham, V. A. Avanzato, R. J. Fischer, J. E. Schulz, M. G. Holbrook, M. J. Hebner, R. Rosenke, T. Thomas, A. Marzi, S. M. Best, E. de Wit, C. Shaia, N. van Doremalen, V. J. Munster, K18-hACE2 mice develop respiratory disease resembling severe COVID-19. *PLOS Pathog.* **17**, e1009195 (2021). [doi:10.1371/journal.ppat.1009195](https://doi.org/10.1371/journal.ppat.1009195) [Medline](#)
43. E. S. Winkler, A. L. Bailey, N. M. Kafai, S. Nair, B. T. McCune, J. Yu, J. M. Fox, R. E. Chen, J. T. Earnest, S. P. Keeler, J. H. Ritter, L.-I. Kang, S. Dort, A. Robichaud, R. Head, M. J. Holtzman, M. S. Diamond, SARS-CoV-2 infection of human ACE2-transgenic mice causes severe lung inflammation and impaired function. *Nat. Immunol.* **21**, 1327–1335 (2020). [doi:10.1038/s41590-020-0778-2](https://doi.org/10.1038/s41590-020-0778-2) [Medline](#)
44. C. L. Hsieh, J. A. Goldsmith, J. M. Schaub, A. M. DiVenere, H.-C. Kuo, K. Javanmardi, K. C. Le, D. Wrapp, A. G. Lee, Y. Liu, C.-W. Chou, P. O. Byrne, C. K. Hjorth, N. V. Johnson, J. Ludes-Meyers, A. W. Nguyen, J. Park, N. Wang, D. Amengor, J. J. Lavinder, G. C. Ippolito, J. A. Maynard, I. J. Finkelstein, J. S. McLellan, Structure-based design of prefusion-stabilized SARS-CoV-2 spikes. *Science* **369**, 1501–1505 (2020).  
[doi:10.1126/science.abd0826](https://doi.org/10.1126/science.abd0826) [Medline](#)
45. A. J. Greaney, A. N. Loes, K. H. D. Crawford, T. N. Starr, K. D. Malone, H. Y. Chu, J. D. Bloom, Comprehensive mapping of mutations in the SARS-CoV-2 receptor-binding domain that affect recognition by polyclonal human plasma antibodies. *Cell Host Microbe* **29**, 463–476.e6 (2021). [doi:10.1016/j.chom.2021.02.003](https://doi.org/10.1016/j.chom.2021.02.003) [Medline](#)
46. T. Zohar, C. Loos, S. Fischinger, C. Atyeo, C. Wang, M. D. Slein, J. Burke, J. Yu, J. Feldman, B. M. Hauser, T. Caradonna, A. G. Schmidt, Y. Cai, H. Streeck, E. T. Ryan, D. H. Barouch, R. C. Charles, D. A. Lauffenburger, G. Alter, Compromised humoral functional evolution tracks with SARS-CoV-2 mortality. *Cell* **183**, 1508–1519.e12 (2020). [doi:10.1016/j.cell.2020.10.052](https://doi.org/10.1016/j.cell.2020.10.052) [Medline](#)
47. J. Yu, L. H. Tostanoski, L. Peter, N. B. Mercado, K. McMahan, S. H. Mahrokhian, J. P. Nkolola, J. Liu, Z. Li, A. Chandrashekar, D. R. Martinez, C. Loos, C. Atyeo, S.



- Fischinger, J. S. Burke, M. D. Slein, Y. Chen, A. Zuiani, F. J. N. Lelis, M. Travers, S. Habibi, L. Pessaint, A. Van Ry, K. Blade, R. Brown, A. Cook, B. Finneyfrock, A. Dodson, E. Teow, J. Velasco, R. Zahn, F. Wegmann, E. A. Bondzie, G. Dagotto, M. S. Gebre, X. He, C. Jacob-Dolan, M. Kirilova, N. Kordana, Z. Lin, L. F. Maxfield, F. Nampanya, R. Nityanandam, J. D. Ventura, H. Wan, Y. Cai, B. Chen, A. G. Schmidt, D. R. Wesemann, R. S. Baric, G. Alter, H. Andersen, M. G. Lewis, D. H. Barouch, DNA vaccine protection against SARS-CoV-2 in rhesus macaques. *Science* **369**, 806–811 (2020). [doi:10.1126/science.abc6284](https://doi.org/10.1126/science.abc6284) [Medline](#)
48. N. van Doremalen, J. N. Purushotham, J. E. Schulz, M. G. Holbrook, T. Bushmaker, A. Carmody, J. R. Port, C. K. Yinda, A. Okumura, G. Saturday, F. Amanat, F. Krammer, P. W. Hanley, B. J. Smith, J. Lovaglio, S. L. Anzick, K. Barbican, C. Martens, S. C. Gilbert, T. Lambe, V. J. Munster, Intranasal ChAdOx1 nCoV-19/AZD1222 vaccination reduces viral shedding after SARS-CoV-2 D614G challenge in preclinical models. *Sci. Transl. Med.* **13**, eabh0755 (2021). [doi:10.1126/scitranslmed.abh0755](https://doi.org/10.1126/scitranslmed.abh0755) [Medline](#)
49. G. Dagotto, N. B. Mercado, D. R. Martinez, Y. J. Hou, J. P. Nkolola, R. H. Carnahan, J. E. Crowe Jr., R. S. Baric, D. H. Barouch, Comparison of Subgenomic and Total RNA in SARS-CoV-2 Challenged Rhesus Macaques. *J. Virol.* **95**, e02370-20 (2021). [doi:10.1128/JVI.02370-20](https://doi.org/10.1128/JVI.02370-20) [Medline](#)
50. P. Kumari, H. A. Rothan, J. P. Natekar, S. Stone, H. Pathak, P. G. Strate, K. Arora, M. A. Brinton, M. Kumar, Neuroinvasion and Encephalitis Following Intranasal Inoculation of SARS-CoV-2 in K18-hACE2 Mice. *Viruses* **13**, 132 (2021). [doi:10.3390/v13010132](https://doi.org/10.3390/v13010132) [Medline](#)
51. B. Pulendran, P. S Arunachalam, D. T. O’Hagan, Emerging concepts in the science of vaccine adjuvants. *Nat. Rev. Drug Discov.* **20**, 454–475 (2021). [doi:10.1038/s41573-021-00163-y](https://doi.org/10.1038/s41573-021-00163-y) [Medline](#)
52. P. B. Gilbert, D. C. Montefiori, A. B. McDermott, Y. Fong, D. Benkeser, W. Deng, H. Zhou, C. R. Houchens, K. Martins, L. Jayashankar, F. Castellino, B. Flach, B. C. Lin, S. O’Connell, C. McDanal, A. Eaton, M. Sarzotti-Kelsoe, Y. Lu, C. Yu, B. Borate, L. W. P. van der Laan, N. S. Hejazi, C. Huynh, J. Miller, H. M. El Sahly, L. R. Baden, M. Baron, L. De La Cruz, C. Gay, S. Kalams, C. F. Kelley, M. P. Andrasik, J. G. Kublin, L. Corey, K. M. Neuzil, L. N. Carpp, R. Pajon, D. Follmann, R. O. Donis, R. A. Koup; Immune Assays Team§; Moderna, Inc. Team§; Coronavirus Vaccine Prevention Network (CoVPN)/Coronavirus Efficacy (COVE) Team§; United States Government (USG)/CoVPN Biostatistics Team§, Immune correlates analysis of the mRNA-1273 COVID-19 vaccine efficacy clinical trial. *Science* **375**, 43–50 (2022). [Medline](#)
53. F. Hansen, K. Meade-White, C. Clancy, R. Rosenke, A. Okumura, D. W. Hawman, F. Feldmann, B. Kaza, M. A. Jarvis, K. Rosenke, H. Feldmann, SARS-CoV-2 reinfection prevents acute respiratory disease in Syrian hamsters but not replication in the upper respiratory tract. *Cell Rep.* **38**, 110515 (2022). [doi:10.1016/j.celrep.2022.110515](https://doi.org/10.1016/j.celrep.2022.110515) [Medline](#)
54. A. J. Greaney, T. N. Starr, P. Gilchuk, S. J. Zost, E. Binshtein, A. N. Loes, S. K. Hilton, J. Huddleston, R. Eguia, K. H. D. Crawford, A. S. Dingens, R. S. Nargi, R. E. Sutton, N. Suryadevara, P. W. Rothlauf, Z. Liu, S. P. J. Whelan, R. H. Carnahan, J. E. Crowe Jr., J. D. Bloom, Complete Mapping of Mutations to the SARS-CoV-2 Spike Receptor-Binding

- Domain that Escape Antibody Recognition. *Cell Host Microbe* **29**, 44–57.e9 (2021). [doi:10.1016/j.chom.2020.11.007](https://doi.org/10.1016/j.chom.2020.11.007) [Medline](#)
55. A. J. Greaney, T. N. Starr, R. T. Eguia, A. N. Loes, K. Khan, F. Karim, S. Cele, J. E. Bowen, J. K. Logue, D. Corti, D. Veessler, H. Y. Chu, A. Sigal, J. D. Bloom, A SARS-CoV-2 variant elicits an antibody response with a shifted immunodominance hierarchy. *PLOS Pathog.* **18**, e1010248 (2022). [doi:10.1371/journal.ppat.1010248](https://doi.org/10.1371/journal.ppat.1010248) [Medline](#)
56. A. C. Walls *et al.*, Distinct sensitivities to SARS-CoV-2 variants in vaccinated humans and mice. bioRxiv 479468 [Preprint] (2022); doi:10.1101/2022.02.07.479468.
57. R. Shinnakasu, S. Sakakibara, H. Yamamoto, P. H. Wang, S. Moriyama, N. Sax, C. Ono, A. Yamanaka, Y. Adachi, T. Onodera, T. Sato, M. Shinkai, R. Suzuki, Y. Matsuura, N. Hashii, Y. Takahashi, T. Inoue, K. Yamashita, T. Kurosaki, Glycan engineering of the SARS-CoV-2 receptor-binding domain elicits cross-neutralizing antibodies for SARS-related viruses. *J. Exp. Med.* **218**, e20211003 (2021). [doi:10.1084/jem.20211003](https://doi.org/10.1084/jem.20211003) [Medline](#)
58. J. Heeney *et al.*, Gene delivery of a single, structurally engineered Coronavirus vaccine antigen elicits SARS-CoV-2 Omicron and pan-Sarbecovirus neutralisation. *Research Square* 995273 [Preprint] (2021); doi:10.21203/rs.3.rs-995273/v1.
59. W. Dejnirattisai, D. Zhou, H. M. Ginn, H. M. E. Duyvesteyn, P. Supasa, J. B. Case, Y. Zhao, T. S. Walter, A. J. Mentzer, C. Liu, B. Wang, G. C. Paesen, J. Slon-Campos, C. López-Camacho, N. M. Kafai, A. L. Bailey, R. E. Chen, B. Ying, C. Thompson, J. Bolton, A. Fyfe, S. Gupta, T. K. Tan, J. Gilbert-Jaramillo, W. James, M. Knight, M. W. Carroll, D. Skelly, C. Dold, Y. Peng, R. Levin, T. Dong, A. J. Pollard, J. C. Knight, P. Klenerman, N. Temperton, D. R. Hall, M. A. Williams, N. G. Paterson, F. K. R. Bertram, C. A. Siebert, D. K. Clare, A. Howe, J. Radecke, Y. Song, A. R. Townsend, K. A. Huang, E. E. Fry, J. Mongkolsapaya, M. S. Diamond, J. Ren, D. I. Stuart, G. R. Screaton, The antigenic anatomy of SARS-CoV-2 receptor binding domain. *Cell* **184**, 2183–2200.e22 (2021). [doi:10.1016/j.cell.2021.02.032](https://doi.org/10.1016/j.cell.2021.02.032) [Medline](#)
60. A. J. Greaney, T. N. Starr, C. O. Barnes, Y. Weisblum, F. Schmidt, M. Caskey, C. Gaebler, A. Cho, M. Agudelo, S. Finkin, Z. Wang, D. Poston, F. Muecksch, T. Hatziioannou, P. D. Bieniasz, D. F. Robbani, M. C. Nussenzweig, P. J. Bjorkman, J. D. Bloom, Mapping mutations to the SARS-CoV-2 RBD that escape binding by different classes of antibodies. *Nat. Commun.* **12**, 4196 (2021). [doi:10.1038/s41467-021-24435-8](https://doi.org/10.1038/s41467-021-24435-8) [Medline](#)
61. T. N. Starr, N. Czudnochowski, Z. Liu, F. Zatta, Y.-J. Park, A. Addetia, D. Pinto, M. Beltramello, P. Hernandez, A. J. Greaney, R. Marzi, W. G. Glass, I. Zhang, A. S. Dingens, J. E. Bowen, M. A. Tortorici, A. C. Walls, J. A. Wojcechowskyj, A. De Marco, L. E. Rosen, J. Zhou, M. Montiel-Ruiz, H. Kaiser, J. R. Dillen, H. Tucker, J. Bassi, C. Silacci-Fregni, M. P. Housley, J. di Iulio, G. Lombardo, M. Agostini, N. Sprugasci, K. Culap, S. Jaconi, M. Meury, E. Dellota Jr., R. Abdelnabi, S. C. Foo, E. Cameroni, S. Stumpf, T. I. Croll, J. C. Nix, C. Havenar-Daughton, L. Piccoli, F. Benigni, J. Neyts, A. Telenti, F. A. Lempp, M. S. Pizzuto, J. D. Chodera, C. M. Hebner, H. W. Virgin, S. P. J. Whelan, D. Veessler, D. Corti, J. D. Bloom, G. Snell, SARS-CoV-2 RBD antibodies that maximize breadth and resistance to escape. *Nature* **597**, 97–102 (2021). [doi:10.1038/s41586-021-03807-6](https://doi.org/10.1038/s41586-021-03807-6) [Medline](#)

62. T. N. Starr, A. J. Greaney, A. Addetia, W. W. Hannon, M. C. Choudhary, A. S. Dings, J. Z. Li, J. D. Bloom, Prospective mapping of viral mutations that escape antibodies used to treat COVID-19. *Science* **371**, 850–854 (2021). [doi:10.1126/science.abf9302](https://doi.org/10.1126/science.abf9302) [Medline](#)
63. E. Cameroni, J. E. Bowen, L. E. Rosen, C. Saliba, S. K. Zepeda, K. Culap, D. Pinto, L. A. VanBlargan, A. De Marco, J. di Iulio, F. Zatta, H. Kaiser, J. Noack, N. Farhat, N. Czudnochowski, C. Havenar-Daughton, K. R. Sprouse, J. R. Dillen, A. E. Powell, A. Chen, C. Maher, L. Yin, D. Sun, L. Soriaga, J. Bassi, C. Silacci-Fregni, C. Gustafsson, N. M. Franko, J. Logue, N. T. Iqbal, I. Mazzitelli, J. Geffner, R. Grifantini, H. Chu, A. Gori, A. Riva, O. Giannini, A. Ceschi, P. Ferrari, P. E. Cippà, A. Franzetti-Pellanda, C. Garzoni, P. J. Halfmann, Y. Kawaoka, C. Hebnner, L. A. Purcell, L. Piccoli, M. S. Pizzuto, A. C. Walls, M. S. Diamond, A. Telenti, H. W. Virgin, A. Lanzavecchia, G. Snell, D. Veessler, D. Corti, Broadly neutralizing antibodies overcome SARS-CoV-2 Omicron antigenic shift. *Nature* **602**, 664–670 (2022). [doi:10.1038/s41586-021-04386-2](https://doi.org/10.1038/s41586-021-04386-2) [Medline](#)
64. D. J. Sheward *et al.*, Structural basis of Omicron neutralization by affinity-matured public antibodies. bioRxiv 474825 [Preprint] (2022); doi:10.1101/2022.01.03.474825.
65. K. Westendorf, S. Žentelis, L. Wang, D. Foster, P. Vaillancourt, M. Wiggin, E. Lovett, R. van der Lee, J. Hendle, A. Pustilnik, J. M. Sauder, L. Kraft, Y. Hwang, R. W. Siegel, J. Chen, B. A. Heinz, R. E. Higgs, N. L. Kallewaard, K. Jepson, R. Goya, M. A. Smith, D. W. Collins, D. Pellacani, P. Xiang, V. de Puyraimond, M. Ricicova, L. Devorkin, C. Pritchard, A. O’Neill, K. Dalal, P. Panwar, H. Dhupar, F. A. Garces, C. A. Cohen, J. M. Dye, K. E. Huie, C. V. Badger, D. Kobasa, J. Audet, J. J. Freitas, S. Hassanali, I. Hughes, L. Munoz, H. C. Palma, B. Ramamurthy, R. W. Cross, T. W. Geisbert, V. Menachery, K. Lokugamage, V. Borisevich, I. Lanz, L. Anderson, P. Sipahimalani, K. S. Corbett, E. S. Yang, Y. Zhang, W. Shi, T. Zhou, M. Choe, J. Misasi, P. D. Kwong, N. J. Sullivan, B. S. Graham, T. L. Fernandez, C. L. Hansen, E. Falconer, J. R. Mascola, B. E. Jones, B. C. Barnhart, LY-CoV1404 (bebtelovimab) potently neutralizes SARS-CoV-2 variants. *Cell Rep.* **39**, 110812 (2022). [doi:10.1016/j.celrep.2022.110812](https://doi.org/10.1016/j.celrep.2022.110812) [Medline](#)
66. M. G. Joyce, W.-H. Chen, R. S. Sankhala, A. Hajduczki, P. V. Thomas, M. Choe, E. J. Martinez, W. C. Chang, C. E. Peterson, E. B. Morrison, C. Smith, R. E. Chen, A. Ahmed, L. Wiczorek, A. Anderson, J. B. Case, Y. Li, T. Oertel, L. Rosado, A. Ganesh, C. Whalen, J. M. Carmen, L. Mendez-Rivera, C. P. Karch, N. Gohain, Z. Villar, D. McCurdy, Z. Beck, J. Kim, S. Shrivastava, O. Jobe, V. Dussupt, S. Molnar, U. Tran, C. B. Kannadka, S. Soman, C. Kuklis, M. Zemil, H. Khanh, W. Wu, M. A. Cole, D. K. Duso, L. W. Kummer, T. J. Lang, S. E. Muncil, J. R. Currier, S. J. Krebs, V. R. Polonis, S. Rajan, P. M. McTamney, M. T. Esser, W. W. Reiley, M. Rolland, N. de Val, M. S. Diamond, G. D. Gromowski, G. R. Matyas, M. Rao, N. L. Michael, K. Modjarrad, SARS-CoV-2 ferritin nanoparticle vaccines elicit broad SARS coronavirus immunogenicity. *Cell Rep.* **37**, 110143 (2021). [doi:10.1016/j.celrep.2021.110143](https://doi.org/10.1016/j.celrep.2021.110143) [Medline](#)
67. K. O. Saunders, E. Lee, R. Parks, D. R. Martinez, D. Li, H. Chen, R. J. Edwards, S. Gobeil, M. Barr, K. Mansouri, S. M. Alam, L. L. Sutherland, F. Cai, A. M. Sanzone, M. Berry, K. Manne, K. W. Bock, M. Minai, B. M. Nagata, A. B. Kapingidza, M. Azoitei, L. V. Tse, T. D. Scobey, R. L. Spreng, R. W. Rountree, C. T. DeMarco, T. N. Denny, C. W.

- Woods, E. W. Petzold, J. Tang, T. H. Oguin 3rd, G. D. Sempowski, M. Gagne, D. C. Douek, M. A. Tomai, C. B. Fox, R. Seder, K. Wiehe, D. Weissman, N. Pardi, H. Golding, S. Khurana, P. Acharya, H. Andersen, M. G. Lewis, I. N. Moore, D. C. Montefiori, R. S. Baric, B. F. Haynes, Neutralizing antibody vaccine for pandemic and pre-emergent coronaviruses. *Nature* **594**, 553–559 (2021). [doi:10.1038/s41586-021-03594-0](https://doi.org/10.1038/s41586-021-03594-0) [Medline](#)
68. A. E. Powell, K. Zhang, M. Sanyal, S. Tang, P. A. Weidenbacher, S. Li, T. D. Pham, J. E. Pak, W. Chiu, P. S. Kim, A Single Immunization with Spike-Functionalized Ferritin Vaccines Elicits Neutralizing Antibody Responses against SARS-CoV-2 in Mice. *ACS Cent. Sci.* **7**, 183–199 (2021). [doi:10.1021/acscentsci.0c01405](https://doi.org/10.1021/acscentsci.0c01405) [Medline](#)
69. P. T. Heath, E. P. Galiza, D. N. Baxter, M. Boffito, D. Browne, F. Burns, D. R. Chadwick, R. Clark, C. Cosgrove, J. Galloway, A. L. Goodman, A. Heer, A. Higham, S. Iyengar, A. Jamal, C. Jeanes, P. A. Kalra, C. Kyriakidou, D. F. McAuley, A. Meyrick, A. M. Minassian, J. Minton, P. Moore, I. Munsoor, H. Nicholls, O. Osanlou, J. Packham, C. H. Pretswell, A. San Francisco Ramos, D. Saralaya, R. P. Sheridan, R. Smith, R. L. Soiza, P. A. Swift, E. C. Thomson, J. Turner, M. E. Viljoen, G. Albert, I. Cho, F. Dubovsky, G. Glenn, J. Rivers, A. Robertson, K. Smith, S. Toback; 2019nCoV-302 Study Group, Safety and Efficacy of NVX-CoV2373 Covid-19 Vaccine. *N. Engl. J. Med.* **385**, 1172–1183 (2021). [doi:10.1056/NEJMoa2107659](https://doi.org/10.1056/NEJMoa2107659) [Medline](#)
70. W. Wang, B. Huang, Y. Zhu, W. Tan, M. Zhu, Ferritin nanoparticle-based SARS-CoV-2 RBD vaccine induces a persistent antibody response and long-term memory in mice. *Cell. Mol. Immunol.* **18**, 749–751 (2021). [doi:10.1038/s41423-021-00643-6](https://doi.org/10.1038/s41423-021-00643-6) [Medline](#)
71. X. Ma, F. Zou, F. Yu, R. Li, Y. Yuan, Y. Zhang, X. Zhang, J. Deng, T. Chen, Z. Song, Y. Qiao, Y. Zhan, J. Liu, J. Zhang, X. Zhang, Z. Peng, Y. Li, Y. Lin, L. Liang, G. Wang, Y. Chen, Q. Chen, T. Pan, X. He, H. Zhang, Nanoparticle Vaccines Based on the Receptor Binding Domain (RBD) and Heptad Repeat (HR) of SARS-CoV-2 Elicit Robust Protective Immune Responses. *Immunity* **53**, 1315–1330.e9 (2020). [doi:10.1016/j.immuni.2020.11.015](https://doi.org/10.1016/j.immuni.2020.11.015) [Medline](#)
72. Q. Geng, W. Tai, V. K. Baxter, J. Shi, Y. Wan, X. Zhang, S. A. Montgomery, S. A. Taft-Benz, E. J. Anderson, A. C. Knight, K. H. Dinno 3rd, S. R. Leist, R. S. Baric, J. Shang, S.-W. Hong, A. Drelich, C. K. Tseng, M. Jenkins, M. Heise, L. Du, F. Li, Novel virus-like nanoparticle vaccine effectively protects animal model from SARS-CoV-2 infection. *PLOS Pathog.* **17**, e1009897 (2021). [doi:10.1371/journal.ppat.1009897](https://doi.org/10.1371/journal.ppat.1009897) [Medline](#)
73. Y. F. Kang, C. Sun, Z. Zhuang, R.-Y. Yuan, Q. Zheng, J.-P. Li, P.-P. Zhou, X.-C. Chen, Z. Liu, X. Zhang, X.-H. Yu, X.-W. Kong, Q.-Y. Zhu, Q. Zhong, M. Xu, N.-S. Zhong, Y.-X. Zeng, G.-K. Feng, C. Ke, J.-C. Zhao, M.-S. Zeng, Rapid Development of SARS-CoV-2 Spike Protein Receptor-Binding Domain Self-Assembled Nanoparticle Vaccine Candidates. *ACS Nano* **15**, 2738–2752 (2021). [doi:10.1021/acsnano.0c08379](https://doi.org/10.1021/acsnano.0c08379) [Medline](#)
74. A. C. Walls, B. Fiala, A. Schäfer, S. Wrenn, M. N. Pham, M. Murphy, L. V. Tse, L. Shehata, M. A. O'Connor, C. Chen, M. J. Navarro, M. C. Miranda, D. Pettie, R. Ravichandran, J. C. Kraft, C. Ogohara, A. Palser, S. Chalk, E.-C. Lee, K. Guerriero, E. Kepl, C. M. Chow, C. Sydeman, E. A. Hodge, B. Brown, J. T. Fuller, K. H. Dinno 3rd, L. E. Gralinski, S. R. Leist, K. L. Gully, T. B. Lewis, M. Guttman, H. Y. Chu, K. K. Lee, D. H. Fuller, R. S.

- Baric, P. Kellam, L. Carter, M. Pepper, T. P. Sheahan, D. Veessler, N. P. King, Elicitation of Potent Neutralizing Antibody Responses by Designed Protein Nanoparticle Vaccines for SARS-CoV-2. *Cell* **183**, 1367–1382.e17 (2020). [doi:10.1016/j.cell.2020.10.043](https://doi.org/10.1016/j.cell.2020.10.043) [Medline](#)
75. D. Li *et al.*, Breadth of SARS-CoV-2 Neutralization and Protection Induced by a Nanoparticle Vaccine. bioRxiv 477915 [Preprint] (2022); [doi:10.1101/2022.01.26.477915](https://doi.org/10.1101/2022.01.26.477915).
76. A. I. Mosa, Antigenic Variability. *Front. Immunol.* **11**, 2057 (2020). [doi:10.3389/fimmu.2020.02057](https://doi.org/10.3389/fimmu.2020.02057) [Medline](#)
77. M. Kanekiyo, M. G. Joyce, R. A. Gillespie, J. R. Gallagher, S. F. Andrews, H. M. Yassine, A. K. Wheatley, B. E. Fisher, D. R. Ambrozak, A. Creanga, K. Leung, E. S. Yang, S. Boyoglu-Barnum, I. S. Georgiev, Y. Tsybovsky, M. S. Prabhakaran, H. Andersen, W.-P. Kong, U. Baxa, K. L. Zephir, J. E. Ledgerwood, R. A. Koup, P. D. Kwong, A. K. Harris, A. B. McDermott, J. R. Mascola, B. S. Graham, Mosaic nanoparticle display of diverse influenza virus hemagglutinins elicits broad B cell responses. *Nat. Immunol.* **20**, 362–372 (2019). [doi:10.1038/s41590-018-0305-x](https://doi.org/10.1038/s41590-018-0305-x) [Medline](#)
78. A. C. Walls, M. C. Miranda, A. Schäfer, M. N. Pham, A. Greaney, P. S. Arunachalam, M.-J. Navarro, M. A. Tortorici, K. Rogers, M. A. O’Connor, L. Shirreff, D. E. Ferrell, J. Bowen, N. Brunette, E. Kepl, S. K. Zepeda, T. Starr, C.-L. Hsieh, B. Fiala, S. Wrenn, D. Pettie, C. Sydeman, K. R. Sprouse, M. Johnson, A. Blackstone, R. Ravichandran, C. Ogohara, L. Carter, S. W. Tilles, R. Rappuoli, S. R. Leist, D. R. Martinez, M. Clark, R. Tisch, D. T. O’Hagan, R. Van Der Most, W. C. Van Voorhis, D. Corti, J. S. McLellan, H. Kleanthous, T. P. Sheahan, K. D. Smith, D. H. Fuller, F. Villinger, J. Bloom, B. Pulendran, R. S. Baric, N. P. King, D. Veessler, Elicitation of broadly protective sarbecovirus immunity by receptor-binding domain nanoparticle vaccines. *Cell* **184**, 5432–5447.e16 (2021). [doi:10.1016/j.cell.2021.09.015](https://doi.org/10.1016/j.cell.2021.09.015) [Medline](#)
79. C. Fan *et al.*, Neutralizing monoclonal antibodies elicited by mosaic RBD nanoparticles bind conserved sarbecovirus epitopes. bioRxiv 497989 [Preprint] (2022); [doi:10.1101/2022.06.28.497989](https://doi.org/10.1101/2022.06.28.497989).
80. T. U. J. Bruun, A. C. Andersson, S. J. Draper, M. Howarth, Engineering a Rugged Nanoscaffold To Enhance Plug-and-Display Vaccination. *ACS Nano* **12**, 8855–8866 (2018). [doi:10.1021/acsnano.8b02805](https://doi.org/10.1021/acsnano.8b02805) [Medline](#)
81. C. O. Barnes, A. P. West Jr., K. E. Huey-Tubman, M. A. G. Hoffmann, N. G. Sharaf, P. R. Hoffman, N. Koranda, H. B. Gristick, C. Gaebler, F. Muecksch, J. C. C. Lorenzi, S. Finkin, T. Häggblöf, A. Hurley, K. G. Millard, Y. Weisblum, F. Schmidt, T. Hatziioannou, P. D. Bieniasz, M. Caskey, D. F. Robbiani, M. C. Nussenzweig, P. J. Bjorkman, Structures of Human Antibodies Bound to SARS-CoV-2 Spike Reveal Common Epitopes and Recurrent Features of Antibodies. *Cell* **182**, 828–842.e16 (2020). [doi:10.1016/j.cell.2020.06.025](https://doi.org/10.1016/j.cell.2020.06.025) [Medline](#)
82. A. A. Cohen, Z. Yang, P. N. P. Gnanapragasam, S. Ou, K. A. Dam, H. Wang, P. J. Bjorkman, Construction, characterization, and immunization of nanoparticles that display a diverse array of influenza HA trimers. *PLOS ONE* **16**, e0247963 (2021). [doi:10.1371/journal.pone.0247963](https://doi.org/10.1371/journal.pone.0247963) [Medline](#)

83. L. J. Reed, H. Muench, A Simple Method of Estimating Fifty Per Cent Endpoints *Am. J. Epidemiol.* **27**, 493–497 (1938). [doi:10.1093/oxfordjournals.aje.a118408](https://doi.org/10.1093/oxfordjournals.aje.a118408)
84. K. H. D. Crawford, R. Eguia, A. S. Dingens, A. N. Loes, K. D. Malone, C. R. Wolf, H. Y. Chu, M. A. Tortorici, D. Veessler, M. Murphy, D. Pettie, N. P. King, A. B. Balazs, J. D. Bloom, Protocol and Reagents for Pseudotyping Lentiviral Particles with SARS-CoV-2 Spike Protein for Neutralization Assays. *Viruses* **12**, 513 (2020). [doi:10.3390/v12050513](https://doi.org/10.3390/v12050513) [Medline](#)
85. S. N. Seifert *et al.*, An ACE2-dependent Sarbecovirus in Russian bats is resistant to SARS-CoV-2 vaccines. bioRxiv 471310 [Preprint] (2022); doi:10.1101/2021.12.05.471310.
86. A. P. West Jr., L. Scharf, J. Horwitz, F. Klein, M. C. Nussenzweig, P. J. Bjorkman, Computational analysis of anti-HIV-1 antibody neutralization panel data to identify potential functional epitope residues. *Proc. Natl. Acad. Sci. U.S.A.* **110**, 10598–10603 (2013). [doi:10.1073/pnas.1309215110](https://doi.org/10.1073/pnas.1309215110) [Medline](#)
87. T. N. Starr, A. J. Greaney, S. K. Hilton, D. Ellis, K. H. D. Crawford, A. S. Dingens, M. J. Navarro, J. E. Bowen, M. A. Tortorici, A. C. Walls, N. P. King, D. Veessler, J. D. Bloom, Deep Mutational Scanning of SARS-CoV-2 Receptor Binding Domain Reveals Constraints on Folding and ACE2 Binding. *Cell* **182**, 1295–1310.e20 (2020). [doi:10.1016/j.cell.2020.08.012](https://doi.org/10.1016/j.cell.2020.08.012) [Medline](#)
88. S. K. Hilton, J. Huddleston, A. Black, K. North, A. S. Dingens, T. Bedford, J. D. Bloom, *dms-view*: Interactive visualization tool for deep mutational scanning data. *J. Open Source Softw.* **5**, 2353 (2020). [doi:10.21105/joss.02353](https://doi.org/10.21105/joss.02353) [Medline](#)
89. M. Landau, I. Mayrose, Y. Rosenberg, F. Glaser, E. Martz, T. Pupko, N. Ben-Tal, ConSurf 2005: The projection of evolutionary conservation scores of residues on protein structures. *Nucleic Acids Res.* **33**, W299-302 (2005). [doi:10.1093/nar/gki370](https://doi.org/10.1093/nar/gki370) [Medline](#)
90. S. Guindon, J.-F. Dufayard, V. Lefort, M. Anisimova, W. Hordijk, O. Gascuel, New algorithms and methods to estimate maximum-likelihood phylogenies: Assessing the performance of PhyML 3.0. *Syst. Biol.* **59**, 307–321 (2010). [doi:10.1093/sysbio/syq010](https://doi.org/10.1093/sysbio/syq010) [Medline](#)
91. F. Sievers, A. Wilm, D. Dineen, T. J. Gibson, K. Karplus, W. Li, R. Lopez, H. McWilliam, M. Remmert, J. Söding, J. D. Thompson, D. G. Higgins, Fast, scalable generation of high-quality protein multiple sequence alignments using Clustal Omega. *Mol. Syst. Biol.* **7**, 539 (2011). [doi:10.1038/msb.2011.75](https://doi.org/10.1038/msb.2011.75) [Medline](#)
